# Supplementary material for: A cross-sectional survey using electronic distribution of a questionnaire to subscribers of educational material written by clinicians, for clinicians, to evaluate whether practice change resulted from reading the Clinical Communiqué
Source: PubMed Central journal article supplement — BMJ Open. 2017 May 29;7(5):e014064. doi: 10.1136/bmjopen-2016-014064 (PMC5730012; doi:10.1136/bmjopen-2016-014064), 2017-05-29
Supplement: bmjopen-2016-014064.draft_revisions.pdf [file bmjopen-2016-014064.draft_revisions.pdf]

# BMJ Open

## Evaluation of electronic educational material written by clinicians, for clinicians - Demonstrating practice change as a result of reading the Clinical Communiqué

|                                 |                                                                                                                                                                                                                                                                                                                                                                      |
|---------------------------------|----------------------------------------------------------------------------------------------------------------------------------------------------------------------------------------------------------------------------------------------------------------------------------------------------------------------------------------------------------------------|
| Journal:                        | <i>BMJ Open</i>                                                                                                                                                                                                                                                                                                                                                      |
| Manuscript ID                   | bmjopen-2016-014064                                                                                                                                                                                                                                                                                                                                                  |
| Article Type:                   | Research                                                                                                                                                                                                                                                                                                                                                             |
| Date Submitted by the Author:   | 28-Aug-2016                                                                                                                                                                                                                                                                                                                                                          |
| Complete List of Authors:       | Cunningham, Nicola; Monash University, Department of Forensic Medicine<br>Pham, Tony; Monash University, Department of Forensic Medicine<br>Kennedy, Briohny; Monash University, Department of Forensic Medicine<br>Gillard, Alexander; Monash University, Department of Forensic Medicine<br>Ibrahim, Joseph E.; Monash University, Department of Forensic Medicine |
| <b>Primary Subject Heading</b>: | Medical education and training                                                                                                                                                                                                                                                                                                                                       |
| Secondary Subject Heading:      | Legal and forensic medicine                                                                                                                                                                                                                                                                                                                                          |
| Keywords:                       | Coroners, Practice change, Printed educational material, patient safety, narrative case reports, death prevention                                                                                                                                                                                                                                                    |
|                                 |                                                                                                                                                                                                                                                                                                                                                                      |

SCHOLARONE™  
Manuscripts

1  
2  
3 **Evaluation of electronic educational material written by clinicians, for clinicians-**  
4  
5  
6 **Demonstrating practice change as a result of reading the Clinical Communiqué**  
7  
8  
9

10  
11 **Dr. Nicola Cunningham<sup>1</sup>, Mr. Tony Pham<sup>1</sup>, Ms. Briohny Kennedy<sup>1</sup>, Mr. Alexander Gillard<sup>1</sup>,**  
12  
13 **Prof. Joseph Ibrahim<sup>1</sup>**  
14  
15

16  
17  
18 <sup>1</sup>**Department of Forensic Medicine, Monash University, 65 Kavanagh Street, Southbank,**  
19  
20  
21 **Victoria 3006, Australia**  
22  
23

24  
25  
26 **Corresponding Author:**  
27

28 Joseph E Ibrahim  
29

30  
31 Department of Forensic Medicine, Monash University, 65 Kavanagh Street, Southbank, Victoria  
32  
33 3006, Australia  
34

35  
36 Telephone number: +61 3 9903 0555  
37

38 Fax number: +61 3 9682 7353  
39

40 Email address: [joseph.ibrahim@monash.edu](mailto:joseph.ibrahim@monash.edu)  
41  
42  
43  
44

45  
46 **Word count: 2496**  
47  
48  
49  
50  
51  
52  
53  
54  
55  
56  
57  
58  
59  
60

## Abstract

**Objective:** To explore whether subscribers declared clinical practice changes as a result of reading the Clinical Communiqué (CC). Secondly, to compare the characteristics of subscribers who self-reported changes to clinical practice with those who did not, and to explore subscribers' perceptions of the educational value of the CC

**Design, setting and participants:** Online cross-sectional survey between 21<sup>st</sup> July 2015 to 18<sup>th</sup> August 2015 by subscribers of the CC (response rate=44.15%, 1,008/2,283)

**Main outcome measures:** Change in clinical practice as a result of reading the CC

**Results:** 496 (53.0%, 496/936) respondents reported that their practice had changed after reading the CC. Respondents also found that the CC raised awareness (96.5%, 912/945) and provided ideas about improving patient safety and care (94.1%, 889/945), leading them to discuss cases with their colleagues (79.6%, 752/945) and review their practice (75.7%, 715/945). Multivariate analysis indicated that working in a residential aged care facility and having taken part in an inquest, were significantly associated with practice change.

**Conclusions:** The design and content of the CC has generated a positive impact on the healthcare community. It is presented in a format that appears to be accessible and acceptable to readers and achieves its goals of promoting safer clinical care through greater awareness of the medico-legal context of practice.

**Strengths and limitations of this study**

- This study evaluates the effect that the Clinical Communiqué (CC) has on its readers in terms of practice change
- There was a substantial number of respondents with over 1000 subscribers participating in the survey
- The response rate is double (44%) that which is usually obtained in online surveys (20%)
- The self-reported change to practice of 53.0% (496/936) is likely an overestimate, however, there is substantive corroboration with 109 subscribers (13%) agreeing 'that if CC was not available, change would not have occurred'
- A control group was not used in our study

## Introduction

Throughout the developed world, about 10% of hospital admissions are associated with an adverse event.<sup>1</sup> The examination of adverse events in healthcare settings is a tool whereby practical information can be generated to stimulate incentives for change at many levels.

However, clinical behaviour is notoriously resistant to change.<sup>2</sup> At an individual level, barriers to, and incentives for change include: awareness, knowledge, attitude, motivation, and behavioural routines.<sup>3</sup> Systemic organisation factors include change fatigue, resource limitations, restructuring and workplace culture.<sup>4</sup>

In general, adverse events and patient harm in healthcare settings occur through errors of commission or errors of omission. Errors of commission often manifest as single high-profile catastrophic events, whereas, errors of omission are more pervasive and difficult to identify.<sup>5</sup> The latter often require careful evaluation to reveal the interplay between remote or unseen factors that may have led to the errors.

In the pursuit of improving patient safety, medico-legal death investigations in healthcare settings allows for identification of areas suitable for change. Inquests provide a forum within which a coroner conducts a detailed analysis of events that contributed to a patient's death. Errors are explored and questions of 'why', 'what', 'where', and 'who' in relation to practice change can be addressed in the coroner's comments and recommendations.

Accessibility of this information to healthcare professionals may be limited by the legal format and technical language of coronial findings. The Clinical Communiqué (CC) is an electronic educational publication that encourages practice change by providing coronial information regarding preventable deaths in acute hospital and community settings. In order to optimize

1  
2  
3 the impact and dissemination of this important information, a relevant clinical context is  
4  
5 combined with accessible language and up-to-date expertise (Box 1). The CC contains narrative  
6  
7 case reports about lessons learned from coroners' investigations and its target audience is  
8  
9 healthcare professionals, clinicians and managers.<sup>6</sup>  
10  
11

## 12 13 **Aim**

14  
15  
16 The primary aim of this study was to explore whether subscribers declared clinical practice  
17  
18 changes as a result of reading the CC. It also compared the characteristics of subscribers who  
19  
20 self-reported changes to clinical practice with those who did not, and explores subscribers'  
21  
22 perceptions of the educational value of the CC.  
23  
24  
25  
26  
27  
28

## 29 **Method**

### 30 **Study Design and Setting**

31  
32  
33 A population-based cross-sectional study was conducted, using an anonymous electronic survey  
34  
35 distributed to all registered subscribers of the Clinical Communiqué (CC). A team from the  
36  
37 Monash University conducted the survey from July to September in 2015.  
38  
39  
40  
41

### 42 **Survey Instrument**

43  
44  
45 The survey instrument was refined from previous studies to address the study objectives.<sup>7-9</sup>  
46  
47 This involved the refinement of the questionnaire through the changing of phrasing, the  
48  
49 addition of new questions and the modification of previous questions by researchers with  
50  
51 extensive knowledge of the health care system to make clear the premise of each item within  
52  
53 the questionnaire. The questionnaire was then piloted with ten health professionals (five  
54  
55  
56  
57  
58  
59  
60

1  
2  
3 nurses and five doctors) and after reviewing the feedback, the survey was further refined. The  
4  
5 final questionnaire was designed and distributed through the open-source web-based  
6  
7 application Survey Monkey.  
8  
9

10 The questionnaire consisted of 33 questions divided into three primary sections: respondent  
11  
12 reading behaviour and evaluation of the CC (10 questions); the impact of the CC, including  
13  
14 details of practice change (13 questions); and respondent characteristics (10 questions). A  
15  
16 change in practice required the respondent to identify the following elements: location (e.g.  
17  
18 inpatient ward), discipline involved (e.g. medical staff), nature (e.g. education, policy, clinical  
19  
20 care), edition of the CC that influenced change, impact on subject (e.g. patient, staff), action  
21  
22 taken (e.g. new initiative). The survey instrument consisted of all closed-ended questions, with  
23  
24 six providing an option to provide further comments. The closed-ended questions were  
25  
26 multiple choice, categorical, dichotomous, and Likert type questions with 5 point rating scales.  
27  
28 Only respondents who reported changing practice after reading the CC were able to answer  
29  
30 questions about changes in professional practice. No identifying data was collected.  
31  
32  
33  
34  
35  
36  
37

### 38 **Study Population**

39  
40 The survey was sent out via email by study investigator through the MailChimp service to all  
41  
42 registered subscribers of the CC at the time the study was conducted, and for whom an email  
43  
44 address was available. A modified Dillman protocol<sup>10</sup> was used to guide subscriber  
45  
46 participation. Subscribers were contacted directly and asked to respond to the survey on the  
47  
48 21<sup>st</sup> July, 2015. Two weeks later, a follow-up reminder email was sent to subscribers and a final  
49  
50 reminder email was sent after a further two weeks. Respondent anonymity was maintained and  
51  
52 the researchers blinded by using the web-based survey tool for collection and collation of data.  
53  
54  
55  
56  
57  
58  
59  
60

1  
2  
3 The electronic system automatically identified the non-responders and reminder notices were  
4 only sent to subscribers who had not responded to the previous email(s).  
5  
6  
7

### 8 **Data Analysis** 9

10 Survey responses were analysed using Statistical Package for the Social Sciences (SPSS) version  
11 20.0 (SPSS, Inc., Chicago, IL). Descriptive statistics were used to summarise information about  
12 respondents' reading behaviour and preferences, the impact of the CC, the nature of self-  
13 reported changes to practice and characteristics of the respondents.  
14  
15  
16  
17  
18  
19

20 Responses to questions answered along an ordinal 5-point Likert-scale were reported using the  
21 median and interquartile range, and dichotomised: "yes" consisted of 5 (strongly agree) and 4  
22 (agree), whereas "no" consisted of 3 (neutral), 2 (disagree) and 1 (strongly disagree). The  
23 ordinal data was collapsed into dichotomous groups as a conservative approach to the analysis  
24 using non-parametric tests. Missing data was analysed using pairwise deletion.  
25  
26  
27  
28  
29  
30

31 Cronbach's alphas were used to estimate the internal reliability of items relating to respondent  
32 opinion about CC content (6 items) and influence on professional practice change (4 items).  
33  
34  
35  
36  
37

38 Cronbach's alphas were estimated using the entire sample of participants.  
39

40 Bivariate analysis was used to compare the characteristics of respondents who self-reported  
41 change in practice with those who did not. Characteristics including respondents' age, gender,  
42 professional role, years of experience, frequency of client interaction, practice setting, contact  
43 with the Coroners Court and reading behaviour, were analysed using the chi-square test.  
44  
45  
46  
47  
48  
49

50 Multivariate logistic regression was used to analyse factors associated with readers who  
51 reported change in practice compared to those who did not. Factors were included in the  
52 regression analysis if  $p < 0.25$  in bivariate analysis<sup>11</sup> or were thought to be important based on  
53  
54  
55  
56  
57  
58  
59  
60

1  
2  
3 expert opinion of senior clinical medical and nursing staff with over 10 years' experience in  
4  
5 medico-legal death investigations. Reference categories were selected based on the category  
6  
7 with the largest number of people as this would be the most robust denominator. Collinearities  
8  
9 were identified using a pairwise correlations matrix with  $r > 0.40$  interpreted as evidence of  
10  
11 collinearity.  
12  
13

### 14 15 16 **Ethics Approval**

17  
18 Institutional ethics approval for this study to proceed was granted from the Victorian Institute  
19  
20 of Forensic Medicine Research Advisory and Ethics Committee. Implicit consent for the project  
21  
22 was considered when the study participants completed the survey.  
23  
24  
25  
26  
27

### 28 29 **Results**

30  
31 Of the 3,385 listed subscribers, 3,373 had valid email addresses. Of these, 2,283 subscribers  
32  
33 opened the email containing the questionnaire. A subsequent 1,008 individuals completed the  
34  
35 survey giving a response rate of 44.15% (1,008/2,283). All respondents provided valid  
36  
37 responses. Cronbach's alphas demonstrated good internal consistency for opinion about CC  
38  
39 content (0.93) and influence on practice change (0.87).  
40  
41  
42  
43

### 44 45 **Respondent demographic and occupational characteristics**

46  
47 The demographics of the respondents are shown in Table 1. Of the 1008 respondents, most  
48  
49 were at or over the age of 45, the majority had worked for over 10 years, and there were more  
50  
51 females than males. The most commonly identified roles were medical practitioner or nurse. A  
52  
53 large proportion worked in clinical roles in Victorian hospitals.  
54  
55

### 56 57 **Respondent reading behaviour and preferences**

1  
2  
3 The majority of respondents reported reading all or almost all of each CC issue and  
4  
5 approximately half had read all four issues of the CC. Most read the CC as soon as it arrived, and  
6  
7 a large proportion used it as a teaching aid. The section most often read was the case  
8  
9 summaries (Table 1).  
10  
11

### 12 13 **Respondent evaluation of the CC**

14  
15 Table 2 shows the respondents' opinions on the content and efficacy of the CC. A large majority  
16  
17 agreed that the content of the CC was useful, reliable, timely, easy to understand, and written  
18  
19 in plain language. Respondents also found that the CC raised awareness and provided ideas  
20  
21 about improving patient safety and care, leading them to discuss cases with their colleagues  
22  
23 and review their practice. The case summaries and expert commentary sections were found to  
24  
25 be the most useful in aiding the respondents to improve patient care. The length of the CC was  
26  
27 regarded as *'just right'* by most of the respondents, and almost all *'would recommend the CC to*  
28  
29 *their colleagues'* (Table 2).  
30  
31  
32  
33  
34

### 35 36 **Nature and significance of self-reported change to practice**

37  
38 496 (53.0%, 496/936) respondents reported that their practice had changed after reading the  
39  
40 CC. Details regarding the nature of practice change are shown in Table 3. The majority of  
41  
42 change was reported to have occurred in staff, at inpatient wards, or residential aged care  
43  
44 facilities, with respect to education and training and clinical practice, involving one or two  
45  
46 discipline groups.  
47  
48

49  
50 Approximately one quarter of respondents reported that without the CC, change would not  
51  
52 have occurred. A larger proportion agreed that the change would have taken longer and  
53  
54 occurred on a smaller scale (Table 3).  
55  
56  
57  
58  
59  
60

### Characteristics and factors associated with respondents who reported change

In bivariate analysis, respondents' age, professional role, and workplace location were found to be significantly associated with practice change.

Multivariate analysis indicated that working in a residential aged care facility and having taken part in an inquest, were significantly associated with practice change. Conversely medical practitioners and pharmacists under the age of 35 years, working in workplaces with minimal patient contact (less than 1 day per week) who had only read 2 or less CC issues, were less likely to change their practice.

### Discussion

This population-based cross-sectional study found the CC prompts readers to initiate change in their professional practice to improve patient safety. With a response rate higher than the predicted average rate of 20-30% for online surveys, and almost double what has been described to meet stringent conditions for response rates when sampling large groups,<sup>12</sup> this study adds to the existing literature on the value of electronic case summaries and commentaries in reaching and influencing the practice of healthcare professionals.

There are many recognised benefits of printed and electronic educational material (PEM). The material is an effective and low cost method of raising awareness. The format and layout can be tailored to appeal to a particular audience to inspire behaviour change. PEM is most effective when combined with other methods, such as using the influence of opinion leaders to disseminate information.<sup>13</sup>

1  
2  
3 The majority of respondents were clinicians who had worked for more than 10 years,  
4  
5 suggesting that the CC appeals not only to junior staff in the early phases of their career path,  
6  
7  
8 but also to experienced staff in senior roles. The benefits of having a readership that spans all  
9  
10 levels of seniority in a healthcare setting, is that change can take place at the frontline, in the  
11  
12 day-to-day aspects of patient care, and also at the policy-making end by staff in positions of  
13  
14 clinical and organisational leadership.  
15  
16

17  
18 The reading behaviour of the respondents showed that there was an overwhelmingly positive  
19  
20 and immediate response to the release of each CC issue. Many respondents forwarded the CC  
21  
22 to their colleagues, or printed and distributed the issue in communal areas, leading to an  
23  
24 estimated reach of more than 28,000 people (Box 2). Clearly not all who read the CC will  
25  
26 become subscribers, however the scale of opportunity to raise awareness and provide ideas  
27  
28 about improving patient safety should not be underestimated. It is the very nature of raising  
29  
30 awareness that may impart the greatest benefit in influencing practice change. In this study,  
31  
32 97.6% (409/419) of respondents who self-reported practice change selected 'raising awareness  
33  
34 of an issue' as directly contributing to the change.  
35  
36  
37  
38  
39

40  
41 Limited information is available from quantitative studies to understand the relationship  
42  
43 between education and change in clinical practice. Education provides one-sixth of the reasons  
44  
45 for changes in clinical practice, and is involved in one-third of the changes.<sup>14</sup> In this study, 53.0%  
46  
47 (496/936) of respondents reported a practice change after reading the CC. More than 90% of  
48  
49 respondents reported that the CC provided ideas about improving patient safety and care and  
50  
51 75.7% (715/945) of respondents had reviewed their practice. This compares favourably to an  
52  
53  
54  
55  
56  
57  
58  
59  
60

1  
2  
3 earlier study where just under half (41.6%, 290/697) of responding subscribers changed their  
4  
5 practice.<sup>8</sup>  
6  
7

8 The CC does not provide rigid guidelines. Instead it provides information that is relayed in the  
9  
10 classic human narrative form of story-telling. This is non-hierarchical and the lessons are  
11  
12 presented in context. Not only is this form of PEM thought-provoking, it stimulates dialogue  
13  
14 between colleagues. 62.4% (590/945) of respondents reported using the CC as a teaching aid,  
15  
16 suggesting they not only read it for personal interest but find the cases and topics highly  
17  
18 relevant to their work and view the material as an appropriate educational resource.  
19  
20  
21

22 Reading individual cases of patient deaths engenders self-reflection and self-assessment, and  
23  
24 encourages healthcare professionals to ask: can this happen to my patient?  
25  
26

27 An important finding was that a quarter of all respondents (26.0%, 109/419) attributed a  
28  
29 practice change solely to reading the CC. Of those that felt a practice change would have  
30  
31 occurred eventually, the majority acknowledged that the change would have been smaller and  
32  
33 taken longer.  
34  
35  
36

37 The survey questions did not explore the extent to which 'practice change' was conceived.  
38  
39 Instead, this study focused on more tangible outcomes such as projects and initiatives as  
40  
41 indicators of practice change. Subtle changes such as a change in communication, or simply  
42  
43 reflecting on a case during a patient-interaction was not asked about, but could occur on a  
44  
45 much more frequent basis and may influence practice in ways that are harder to measure.  
46  
47  
48

49 The findings that medical practitioners and pharmacists under the age of 35 years and working  
50  
51 with minimal patient contact were less likely to change their practice as a result of reading the  
52  
53 CC, may suggest that the educational relevance was not as applicable to their working roles and  
54  
55  
56  
57  
58  
59  
60

1  
2  
3 environment. The cases were predominantly set in hospital wards, and the key messages were  
4  
5 largely centred around staff tasked with responding to an acutely unwell patient.  
6  
7

8  
9 A limitation of this study is that subscribers were asked to participate and discuss practice  
10  
11 change after only four issues had been released. Clinical guidelines can take up to three years  
12  
13 to be fully implemented.<sup>13</sup>  
14

15  
16 Another limitation of this study is that the scope did not allow the investigators to examine in  
17  
18 detail the changes that were reported, or whether the practice changes sustained over time.  
19

20  
21 Therefore, quantifying the risk reduction and lives saved is not possible. Also, control groups  
22  
23 were not utilised.  
24  
25  
26  
27

## 28 **Conclusion**

29  
30  
31  
32 Investigations into patient deaths identify preventable errors and enhance knowledge of the  
33  
34 many risks to patients that exist in the healthcare setting. The design and content of the CC has  
35  
36 generated a positive impact on the healthcare community. It is presented in a format that  
37  
38 appears to be accessible and acceptable to readers and achieves its goals of promoting safer  
39  
40 clinical care through greater awareness of the medico-legal context of practice.  
41  
42  
43  
44  
45  
46  
47

## 48 **Contributors**

49  
50 **JEI** contributed to conception, design and development of the study, assembly of the survey  
51  
52 and revising the manuscript critically for important intellectual content; and as senior author is  
53  
54 accountable for all aspects of the work in ensuring that questions related to the accuracy or  
55  
56  
57  
58  
59  
60

1  
2  
3 integrity of any part of the work are appropriately investigated and resolved. **NC** contributed to  
4  
5 development of the survey, was involved in drafting the manuscript and revising it critically for  
6  
7 important intellectual content. **TP** performed the statistical analysis was involved in drafting the  
8  
9 manuscript and revising it critically for important intellectual content. **BK** contributed to  
10  
11 development of the study, was involved in revising the manuscript critically for important  
12  
13 intellectual content. **AG** contributed to development, distribution, monitoring and collation of  
14  
15 the survey. All authors read and approved the final manuscript.  
16  
17  
18  
19  
20  
21  
22  
23

## 24 **Funding**

25  
26 The Victorian Managed Insurance Authority (VMIA) funded this study.  
27  
28  
29  
30  
31

## 32 **Competing interests**

33  
34 JEI and NC are directly involved in the production of the “Clinical Communiqué”. Otherwise the  
35  
36 authors have no competing interests  
37  
38  
39  
40  
41

## 42 **Data Sharing**

43  
44 No additional data are available.  
45  
46  
47  
48  
49

## 50 **References**

- 51  
52  
53  
54 1. Rafter N, Hickey A, Condell S, et al. Adverse events in healthcare: learning from  
55 mistakes. QJM 2014;108(4):273-277.  
56  
57  
58  
59  
60

- 1
  - 2
  - 3
  - 4
  - 5
  - 6
  - 7
  - 8
  - 9
  - 10
  - 11
  - 12
  - 13
  - 14
  - 15
  - 16
  - 17
  - 18
  - 19
  - 20
  - 21
  - 22
  - 23
  - 24
  - 25
  - 26
  - 27
  - 28
  - 29
  - 30
  - 31
  - 32
  - 33
  - 34
  - 35
  - 36
  - 37
  - 38
  - 39
  - 40
  - 41
  - 42
  - 43
  - 44
  - 45
  - 46
  - 47
  - 48
  - 49
  - 50
  - 51
  - 52
  - 53
  - 54
  - 55
  - 56
  - 57
  - 58
  - 59
  - 60
2. McKee M, Healy J. The role of the hospital in a changing environment. *Bulletin of the World Health Organization* 2000;78(6):803-808.
  3. Grol R, Wensing M. What drives change? Barriers to and incentives for achieving evidence-based practice. *MJA* 2004;180:S57-S60.
  4. Travaglia J, Debono D, Thoms D, et al. Change management strategies and practice development in nursing: a review of the literature. 2011. Report No.:ISBN: 978-0-7334-3071-8.
  5. Cook D, Montori V, McMullin J, et al. Improving patients' safety locally: changing clinician behaviour. *The Lancet* 2004;363:1224-1230.
  6. About the Clinical Communique. [Online] Melbourne: VIFM Communiques; 2014 [updated 2016]; Available from: <http://www.vifmcommuniques.org/about-the-clinical-communique/>
  7. Ibrahim J, Ehsani J. The impact of the Coronial Communiqué on changing patient safety: a subscriber survey. *Australian Health Review* 2009;33:583-591.
  8. Ibrahim J, Ehsani J, McInnes J. The effect of printed educational material from the coroner in Victoria, Australia, on changing aged care health professional practice: a subscriber survey. *J Am Geriatr Soc* 2010;58(3):585-591.
  9. Pham D, Ibrahim J, Kitching F, et al. Aged-care professionals' and health care professionals' self-reported impact of printed educational material on clinical practice. *J Contin Educ Health Prof* 2016;36(1):38-45.
  10. Dillman D. *Mail and telephone surveys: The Total Design Method*. New York: J Wiley; 1999.
  11. Hosmer D, Lemeshow S. *Applied logistic regression*. New York: Wiley; 1989.
  12. Nulty D. The adequacy of response rates to online and paper surveys: what can be done? *Assessment & Evaluation in Higher Education* 2008;33(3):301-314.
  13. *How to change practice - Understand, identify and overcome barriers to change*. London: National Institute for Health and Clinical Excellence; 2007. Report No.:1-84629-565-3.
  14. Allery L, Owen P, Robling M. Why general practitioners and consultants change their clinical practice: a critical incident study. *BMJ* 1997;314(7084):870-874.
  15. Ibrahim J, Cunningham N, O'Brien A, et al. The impact of a clinical team assisting the Coroner's investigation of healthcare-related deaths: reflections on six-years of service. *Legal Medicine* 2010;12:28-34.
  16. *National Safety and Quality Health Service Standards*. Sydney: National Safety and Quality Health Service Standards, ACSQHC; 2012.

## Boxes and Tables

### Box 1.

#### History of the Clinical Communiqué

The CC was launched in September 2014 as a revamped version of the Coronial Communiqué. Established in 2003, the Coronial Communiqué represented the first serial electronic publication of narrative case reports about clinical lessons learned from patient deaths investigated by the Victorian Coroner's Office.<sup>15</sup> Twenty-one editions were released before it went into a hiatus in 2009 due to resource constraints. In its current form, the CC is published quarterly and uses coronial cases from local, interstate, and international jurisdictions to explore the challenges that clinicians face every day in providing clinical care. Each issue identifies key themes that are vital to improving patient safety such as communication, supervision, decision-making, and recognising the deteriorating patient. Many of the themes are reflected in the National Safety and Quality Health Service Standards.<sup>16</sup> These are presented as case summaries and expert commentaries.

**Table 1.** Demographic and occupational characteristics and respondent reading behaviour (N=1008)

| Demographic and occupational characteristics        |                                       | n   | %    |
|-----------------------------------------------------|---------------------------------------|-----|------|
| <b>Age (years)<sup>a</sup></b>                      |                                       |     |      |
|                                                     | ≤34                                   | 101 | 11.6 |
|                                                     | 35-44                                 | 196 | 22.5 |
|                                                     | 45-54                                 | 308 | 35.3 |
|                                                     | ≥55                                   | 268 | 30.7 |
| <b>Gender<sup>a</sup></b>                           |                                       |     |      |
|                                                     | Female                                | 643 | 73.7 |
|                                                     | Male                                  | 230 | 26.3 |
| <b>Professional Role<sup>a</sup></b>                |                                       |     |      |
|                                                     | Allied Health Professional            | 25  | 2.9  |
|                                                     | Medical Practitioner                  | 240 | 27.5 |
|                                                     | Nurse                                 | 277 | 31.7 |
|                                                     | Paramedic                             | 24  | 2.7  |
|                                                     | Pharmacist                            | 35  | 4.0  |
|                                                     | Quality and Risk Manager              | 99  | 11.3 |
|                                                     | Other                                 | 173 | 19.8 |
| <b>Experience in profession (years)<sup>a</sup></b> |                                       |     |      |
|                                                     | ≤5                                    | 183 | 21.0 |
|                                                     | 6-10                                  | 130 | 14.9 |
|                                                     | 11-15                                 | 115 | 13.2 |
|                                                     | 16-20                                 | 86  | 9.9  |
|                                                     | ≥21                                   | 359 | 41.1 |
| <b>Workplace setting<sup>a</sup></b>                |                                       |     |      |
|                                                     | Government Department/Agency          | 41  | 4.7  |
|                                                     | Hospital – Acute                      | 451 | 51.7 |
|                                                     | Hospital – Subacute                   | 47  | 5.4  |
|                                                     | Primary Care                          | 72  | 8.2  |
|                                                     | Residential Aged Care Service         | 109 | 12.5 |
|                                                     | University or Other Academic          | 32  | 3.7  |
|                                                     | Other                                 | 121 | 13.9 |
| <b>State or country<sup>a</sup></b>                 |                                       |     |      |
|                                                     | Victoria                              | 549 | 62.9 |
|                                                     | Other State or Territory of Australia | 313 | 35.9 |
|                                                     | Other Country                         | 11  | 1.3  |

|                                                                                                                                                                                |                                                    |          |          |
|--------------------------------------------------------------------------------------------------------------------------------------------------------------------------------|----------------------------------------------------|----------|----------|
| <b>Frequency of patient interaction per week (days)<sup>a</sup></b>                                                                                                            |                                                    |          |          |
|                                                                                                                                                                                | Less than one                                      | 230      | 26.3     |
|                                                                                                                                                                                | One                                                | 58       | 6.6      |
|                                                                                                                                                                                | Two or three                                       | 107      | 12.3     |
|                                                                                                                                                                                | Four or more                                       | 478      | 54.8     |
| <b>Level of contact with Coroners Court<sup>a</sup></b>                                                                                                                        |                                                    |          |          |
|                                                                                                                                                                                | Taken part in an inquest                           | 148      | 17.0     |
|                                                                                                                                                                                | Provided a statement                               | 207      | 23.7     |
|                                                                                                                                                                                | Contacted Court to discuss if death was reportable | 338      | 38.7     |
|                                                                                                                                                                                | Contacted Court for other reasons                  | 289      | 33.1     |
|                                                                                                                                                                                | No contact                                         | 299      | 34.2     |
| <b>Respondent Reading Behaviour and Preferences</b>                                                                                                                            |                                                    | <b>n</b> | <b>%</b> |
| <b>Respondent reading behaviour</b>                                                                                                                                            |                                                    |          |          |
|                                                                                                                                                                                | Read all 4 issues <sup>b</sup>                     | 466      | 47.1     |
|                                                                                                                                                                                | Read all or almost all of each issue <sup>c</sup>  | 747      | 79.0     |
| <b>Respondents regularly read the following sections<sup>d,e</sup></b>                                                                                                         |                                                    |          |          |
|                                                                                                                                                                                | Case summaries                                     | 927      | 99.3     |
|                                                                                                                                                                                | Expert commentary                                  | 916      | 98.0     |
|                                                                                                                                                                                | Editorial                                          | 821      | 88.1     |
|                                                                                                                                                                                | Resources list                                     | 525      | 56.6     |
| <b>Use of the Clinical Communiqué<sup>c,e</sup></b>                                                                                                                            |                                                    |          |          |
|                                                                                                                                                                                | I read it as soon as it arrives                    | 802      | 84.9     |
|                                                                                                                                                                                | I encourage my colleagues to read it               | 681      | 72.1     |
|                                                                                                                                                                                | I refer to it in my job                            | 407      | 43.1     |
|                                                                                                                                                                                | I use it as a teaching aid                         | 590      | 62.4     |
| <sup>a</sup> 135 respondents failed to answer this question and were not included in the analysis (N=873)                                                                      |                                                    |          |          |
| <sup>b</sup> 19 respondents failed to answer this question and were not included in the analysis (N=989)                                                                       |                                                    |          |          |
| <sup>c</sup> 63 respondents failed to answer this question and were not included in the analysis (N=945)                                                                       |                                                    |          |          |
| <sup>d</sup> The number of respondents varies for this question (N=934, 935, 932, 928) respectively                                                                            |                                                    |          |          |
| <sup>e</sup> Five-point Likert scale, 5=strongly agree to 1=strongly disagree. Positive responses are counted as the sum of responses that stated 'strongly agree' and 'agree' |                                                    |          |          |
| <b>NB.</b> Because of rounding not all percentages cumulatively sum to 100                                                                                                     |                                                    |          |          |

**Table 2.** Respondent Evaluation Criteria (N=1008)

| Respondent Evaluation Criteria                                                                                                                                                          | n   | %    | Median (25 <sup>th</sup> - 75 <sup>th</sup> percentile) |
|-----------------------------------------------------------------------------------------------------------------------------------------------------------------------------------------|-----|------|---------------------------------------------------------|
| <b>Information given in the Clinical Communiqué is:<sup>a,b</sup></b>                                                                                                                   |     |      |                                                         |
| Useful                                                                                                                                                                                  | 928 | 99.2 | 5 (4-5)                                                 |
| Reliable                                                                                                                                                                                | 907 | 96.9 | 5 (4-5)                                                 |
| Timely                                                                                                                                                                                  | 728 | 77.8 | 4 (4-5)                                                 |
| Easy to understand                                                                                                                                                                      | 912 | 97.4 | 5 (4-5)                                                 |
| Written in plain language                                                                                                                                                               | 917 | 98.0 | 5 (4-5)                                                 |
| <b>The following sections of the Clinical Communiqué are useful for improving patient care:<sup>a,b</sup></b>                                                                           |     |      |                                                         |
| Case summaries                                                                                                                                                                          | 922 | 98.5 | 5 (4-5)                                                 |
| Expert commentary                                                                                                                                                                       | 914 | 97.7 | 5 (4-5)                                                 |
| Editorial                                                                                                                                                                               | 799 | 85.4 | 4 (4-5)                                                 |
| Resources list                                                                                                                                                                          | 628 | 67.1 | 4 (3-4)                                                 |
| <b>Reading the Clinical Communiqué<sup>b,c</sup></b>                                                                                                                                    |     |      |                                                         |
| Raised awareness about improving patient safety and clinical care                                                                                                                       | 912 | 96.5 | 5 (4-5)                                                 |
| Provided ideas for improving safety and clinical care                                                                                                                                   | 889 | 94.1 | 4 (4-5)                                                 |
| Prompted me to discuss cases with colleagues                                                                                                                                            | 752 | 79.6 | 4 (4-5)                                                 |
| Prompted me to review my practice                                                                                                                                                       | 715 | 75.7 | 4 (4-4)                                                 |
| <b>The length of the Clinical Communiqué is just right<sup>a</sup></b>                                                                                                                  | 766 | 81.8 | –                                                       |
| <b>I would recommend the Clinical Communiqué to my colleagues<sup>a,d</sup></b>                                                                                                         | 927 | 99.0 | 5 (5-5)                                                 |
| <sup>a</sup> 72 respondents failed to answer this question and were excluded from analysis (N=936)                                                                                      |     |      |                                                         |
| <sup>b</sup> 63 respondents failed to answer this question and were excluded from analysis (N=945)                                                                                      |     |      |                                                         |
| <sup>c</sup> Five-point Likert scale, 5=strongly agree to 1=strongly disagree. Positive responses are counted as the sum of responses that stated 'strongly agree' and 'agree'          |     |      |                                                         |
| <sup>d</sup> Five-point Likert scale, 5 = definitely yes to 1 = definitely not. Positive responses are counted as the sum of responses that stated 'definitely yes' and 'probably yes'. |     |      |                                                         |

**Table 3.** Details of self-reported change to practice (N=496)

| <b>Characteristics of practice change</b>                                              | <b>n</b> | <b>%</b> |
|----------------------------------------------------------------------------------------|----------|----------|
| <b>Workplace<sup>a</sup></b>                                                           |          |          |
| Emergency department                                                                   | 89       | 21.2     |
| Intensive care unit                                                                    | 42       | 10.0     |
| Operating theatre                                                                      | 51       | 12.2     |
| Inpatient ward                                                                         | 146      | 34.8     |
| Outpatient unit primary care                                                           | 47       | 11.2     |
| Residential aged care facility                                                         | 119      | 28.4     |
| Other                                                                                  | 92       | 22.0     |
| <b>Who was involved in the practice change?<sup>a</sup></b>                            |          |          |
| One discipline group (e.g. doctors only)                                               | 157      | 37.5     |
| Two discipline groups (e.g. doctors and nurses)                                        | 188      | 44.9     |
| Three discipline groups (e.g. doctors, nurses and pharmacists)                         | 48       | 11.5     |
| Four or more discipline groups                                                         | 38       | 9.1      |
| <b>Practice change was related to<sup>a</sup></b>                                      |          |          |
| Education and training                                                                 | 286      | 68.3     |
| Policy, procedures and protocols                                                       | 182      | 43.4     |
| Clinical practice                                                                      | 283      | 67.5     |
| Evaluation of care                                                                     | 142      | 33.9     |
| Documentation of practice                                                              | 205      | 48.9     |
| Improving staff morale/attitude                                                        | 122      | 29.1     |
| Environment/equipment                                                                  | 65       | 15.5     |
| <b>Edition of the Clinical Communiqué which influenced practice change<sup>a</sup></b> |          |          |
| 'Communiqué cases and the National Health Service Standards'                           | 124      | 29.6     |
| 'Recognising early warning signs of the deteriorating patient'                         | 341      | 81.4     |
| 'Communication and decision making at the bedside'                                     | 253      | 60.4     |
| 'Responding as a team to medical emergency'                                            | 191      | 45.6     |
| <b>The practice change had an impact on<sup>a</sup></b>                                |          |          |
| Patient care                                                                           | 339      | 80.9     |
| Staff                                                                                  | 380      | 90.7     |
| Environment                                                                            | 215      | 51.3     |
| Organisation                                                                           | 268      | 64.0     |
| <b>The action taken in the practice change was to<sup>a</sup></b>                      |          |          |
| Introduce a new initiative                                                             | 71       | 16.9     |
| Alter or modify an existing initiative                                                 | 382      | 91.2     |
| Discontinue an existing initiative                                                     | 24       | 5.7      |

**Number of initiatives where the Clinical Communiqué was used to change practice<sup>a</sup>**

|              |     |      |
|--------------|-----|------|
| One          | 151 | 36.0 |
| Two          | 175 | 41.8 |
| Three        | 63  | 15.0 |
| Four         | 12  | 2.9  |
| Five or more | 19  | 4.5  |

**Degree to which the Clinical Communiqué influenced practice change<sup>a,b</sup>**

|                                        |     |      |
|----------------------------------------|-----|------|
| Selecting area of improvement          | 306 | 73.0 |
| Defining the scope of the project      | 173 | 41.3 |
| Engaging senior management             | 189 | 45.1 |
| Engaging point of care staff           | 276 | 65.9 |
| Identifying required resources         | 203 | 48.5 |
| Setting project timelines              | 76  | 18.1 |
| Gathering background research/analysis | 227 | 54.2 |

**The Clinical Communiqué influenced practice change<sup>a,c</sup>**

|                                                        |     |      |
|--------------------------------------------------------|-----|------|
| By raising awareness of an issue                       | 409 | 97.6 |
| By engaging staff                                      | 354 | 84.5 |
| Because of the authority of the publication            | 310 | 74.0 |
| By suggesting improvement strategies                   | 359 | 85.7 |
| By prompting staff to evaluate their existing practice | 369 | 88.1 |

**If the Clinical Communiqué had not been available, the change would have<sup>a,c</sup>**

|                             |     |      |
|-----------------------------|-----|------|
| Happened anyway             | 129 | 30.8 |
| Taken longer                | 347 | 82.8 |
| Happened on a smaller scale | 236 | 56.3 |
| Not occurred                | 109 | 26.0 |

<sup>a</sup>77 respondents failed to answer this question and were excluded from analysis (N=419)

<sup>b</sup>Five-point Likert scale, 5=strongly agree to 1=strongly disagree. Positive responses are counted as the sum of responses that stated 'strongly agree' and 'agree'

<sup>c</sup>Five-point Likert scale, 5=extremely influential to 1=not at all influential. Positive responses are counted as the sum of responses that stated 'extremely influential' and 'very influential'

**Box 2.****Reach of the Clinical Communiqué**

As the CC is delivered via email, it is difficult to determine exactly how many people are being exposed to the contents of the CC. Therefore by asking respondents how many people have access to the CC at their workplace, it was calculated that for this sample of 1,008 respondents, the CC reached between 28,575 and 30,958 people. Therefore, each person on average, shared the CC with at least 9 other people.

Peer review only

# BMJ Open

**A cross-sectional survey using electronic distribution of a questionnaire to subscribers of educational material written by clinicians, for clinicians, to evaluate whether practice change resulted from reading the Clinical Communiqué**

|                                 |                                                                                                                                                                                                                                                                                                                                                                      |
|---------------------------------|----------------------------------------------------------------------------------------------------------------------------------------------------------------------------------------------------------------------------------------------------------------------------------------------------------------------------------------------------------------------|
| Journal:                        | <i>BMJ Open</i>                                                                                                                                                                                                                                                                                                                                                      |
| Manuscript ID                   | bmjopen-2016-014064.R1                                                                                                                                                                                                                                                                                                                                               |
| Article Type:                   | Research                                                                                                                                                                                                                                                                                                                                                             |
| Date Submitted by the Author:   | 24-Jan-2017                                                                                                                                                                                                                                                                                                                                                          |
| Complete List of Authors:       | Cunningham, Nicola; Monash University, Department of Forensic Medicine<br>Pham, Tony; Monash University, Department of Forensic Medicine<br>Kennedy, Briohny; Monash University, Department of Forensic Medicine<br>Gillard, Alexander; Monash University, Department of Forensic Medicine<br>Ibrahim, Joseph E.; Monash University, Department of Forensic Medicine |
| <b>Primary Subject Heading</b>: | Medical education and training                                                                                                                                                                                                                                                                                                                                       |
| Secondary Subject Heading:      | Legal and forensic medicine                                                                                                                                                                                                                                                                                                                                          |
| Keywords:                       | Coroners, Practice change, Printed educational material, patient safety, narrative case reports, death prevention                                                                                                                                                                                                                                                    |
|                                 |                                                                                                                                                                                                                                                                                                                                                                      |

SCHOLARONE™  
Manuscripts

1  
2  
3 **A cross-sectional survey using electronic distribution of a questionnaire to subscribers of**  
4  
5 **educational material written by clinicians, for clinicians, to evaluate whether practice change**  
6  
7 **resulted from reading the Clinical Communiqué**  
8  
9

10  
11  
12  
13  
14  
15  
16 **Dr. Nicola Cunningham<sup>1</sup>, Mr. Tony Pham<sup>1</sup>, Ms. Briohny Kennedy<sup>1</sup>, Mr. Alexander Gillard<sup>1</sup>,**  
17  
18 **Prof. Joseph Ibrahim<sup>1</sup>**  
19

20  
21  
22  
23 **<sup>1</sup>Department of Forensic Medicine, Monash University, 65 Kavanagh Street, Southbank,**  
24  
25 **Victoria 3006, Australia**  
26

27  
28  
29  
30  
31 **Corresponding Author:**

32 Joseph E Ibrahim

33  
34 Department of Forensic Medicine, Monash University, 65 Kavanagh Street, Southbank, Victoria  
35  
36  
37  
38 3006, Australia

39  
40 Telephone number: +61 3 9903 0555

41  
42 Fax number: +61 3 9682 7353

43  
44 Email address: [joseph.ibrahim@monash.edu](mailto:joseph.ibrahim@monash.edu)  
45  
46  
47

48  
49  
50 **Word count: 2755**  
51  
52  
53  
54  
55  
56  
57  
58  
59  
60

## Abstract

**Objective:** To explore whether subscribers reported clinical practice changes as a result of reading the Clinical Communiqué (CC). Secondly, to compare the characteristics of subscribers who self-reported changes to clinical practice with those who did not, and to explore subscribers' perceptions of the educational value of the CC.

**Design, setting and participants:** Online cross-sectional survey between 21<sup>st</sup> July 2015 to 18<sup>th</sup> August 2015 by subscribers of the CC (response rate=44.2%).

**Main outcome measures:** Change in clinical practice as a result of reading the CC.

**Results:** 53.0% of respondents reported that their practice had changed after reading the CC. Respondents also found that the CC raised awareness (96.5%) and provided ideas about improving patient safety and care (94.1%) leading them to discuss cases with their colleagues (79.6%) and review their practice (75.7%). Multivariate analysis indicated that working in a residential aged care facility and having taken part in an inquest, were significantly associated with practice change.

**Conclusion:** The design and content of the CC has generated a positive impact on the healthcare community. It is presented in a format that appears to be accessible and acceptable to readers and achieves its goals of promoting safer clinical care through greater awareness of the medico-legal context of practice.

**Strengths and limitations of this study**

- This study evaluates the effect that the Clinical Communiqué (CC) has on its readers in terms of practice change
- There was a substantial number of respondents with over 1000 subscribers participating in the survey
- The response rate is double (44%) that which is usually obtained in online surveys (20%)
- The self-reported change to practice of 53.0% is likely an overestimate, however, there is substantive corroboration with 109 subscribers (13%) agreeing 'that if CC was not available, change would not have occurred'
- A control group was not used in our study

## Introduction

Throughout the developed world, it has been estimated that about 10% of hospital admissions are associated with an adverse event.<sup>1</sup> The examination of adverse events in healthcare settings is a tool whereby practical information can be generated to stimulate incentives for change at many levels. However, clinical behaviour is notoriously resistant to change.<sup>2</sup> At an individual level, barriers to (and incentives for) change include: awareness, knowledge, attitude, motivation, and behavioural routines.<sup>3</sup> Systemic organisational factors include change fatigue, resource limitations, restructuring and workplace culture.<sup>4</sup>

Adverse events and patient harm in healthcare settings occur through errors of commission or errors of omission. Errors of commission often manifest as single high-profile catastrophic events, whereas, errors of omission may be more pervasive and difficult to identify.<sup>5</sup> The latter often require careful evaluation to reveal the interplay between remote or unseen factors that may have led to the errors.

In the pursuit of improving patient safety, medico-legal death investigations in healthcare settings can allow for identification of areas suitable for change. Inquests provide a forum within which a coroner conducts a detailed analysis of events that contributed to a patient's death. Errors are explored and questions of 'why', 'what', 'where', and 'who' in relation to practice change can be addressed in the coroner's comments and recommendations.

Accessibility of this information to healthcare professionals may be limited by the legal format and technical language of coronial findings. The Clinical Communiqué (CC) is an electronic educational publication that encourages practice reflection and change by providing coronial information regarding preventable deaths in acute hospital and community settings. In order to

1  
2  
3 optimize the impact and dissemination of this important information, a relevant clinical context  
4  
5  
6 is combined with accessible language and up-to-date expertise (Box 1). The CC contains  
7  
8  
9 narrative case reports about lessons learned from coroners' investigations and its target  
10  
11 audience is healthcare professionals, clinicians and managers.<sup>6</sup>  
12

## 13 **Aim**

14  
15  
16  
17 The primary aim of this study was to explore whether subscribers reported clinical practice  
18  
19 changes as a result of reading the CC. It also compared the characteristics of subscribers who  
20  
21 self-reported changes to clinical practice with those who did not, and explores subscribers'  
22  
23 perceptions of the educational value of the CC.  
24  
25  
26  
27  
28

## 29 **Method**

### 30 **Study Design and Setting**

31  
32  
33 A population-based cross-sectional study was conducted, using an anonymous electronic survey  
34  
35 distributed to all registered subscribers of the Clinical Communiqué (CC). A team from the  
36  
37 Monash University conducted the survey from July to September in 2015.  
38  
39  
40  
41

### 42 **Survey Instrument**

43  
44  
45 The survey instrument was refined from previous studies to address the study objectives.<sup>9-11</sup>  
46  
47 This involved the refinement of the questionnaire through the changing of phrasing, the  
48  
49 addition of new questions and the modification of previous questions by researchers with  
50  
51 extensive knowledge of the health care system to make clear the premise of each item within  
52  
53 the questionnaire. The questionnaire was then piloted with ten health professionals (five  
54  
55  
56  
57  
58  
59  
60

1  
2  
3 nurses and five doctors) and after reviewing the feedback, the survey was further refined. The  
4  
5 final questionnaire was designed and distributed through the web-based application Survey  
6  
7  
8 Monkey.  
9

10  
11 The questionnaire consisted of 33 questions divided into three sections: respondent reading  
12  
13 behaviour and evaluation of the CC (10 questions); the impact of the CC, including details of  
14  
15 practice change (13 questions); and respondent characteristics (10 questions). A change in  
16  
17 practice required the respondent to identify the following elements: location (e.g. inpatient  
18  
19 ward), discipline involved (e.g. medical staff), nature (e.g. education, policy, clinical care),  
20  
21 edition of the CC that influenced change, impact on subject (e.g. patient, staff), and action  
22  
23 taken (e.g. new initiative). The survey instrument consisted of closed-ended questions, of which  
24  
25 six allowed respondents the opportunity to provide further detail if the 'other' option was  
26  
27 selected from the multiple choices. The closed-ended questions were multiple choice,  
28  
29 categorical, dichotomous, and Likert-type questions with 5 point rating scales.  
30  
31  
32  
33  
34

35  
36 Only respondents who reported changing practice after reading the CC were able to answer  
37  
38 questions about changes in professional practice. No identifying data was collected.  
39  
40

### 41 **Study Population**

42  
43 The survey was sent out via email by study investigator through the MailChimp service to all  
44  
45 registered subscribers of the CC at the time the study was conducted, and for whom an email  
46  
47 address was available. A modified Dillman protocol<sup>12</sup> was used to guide subscriber  
48  
49 participation. Subscribers were contacted directly via email and asked to respond to the survey  
50  
51 on 21 July, 2015. Two weeks later, a follow-up reminder email was sent to subscribers and a  
52  
53 final reminder email was sent after a further two weeks. Respondent anonymity was  
54  
55  
56  
57  
58  
59  
60

1  
2  
3 maintained and the researchers blinded by using the web-based survey tool for collection and  
4  
5 collation of data. The electronic system automatically identified the non-responders and  
6  
7  
8 reminder notices were only sent to subscribers who had not responded to the previous  
9  
10  
11 email(s). The Survey Monkey settings were set to refuse multiple responses from the same IP  
12  
13  
14 address.

### 15 16 **Data Analysis**

17  
18 Survey responses were analysed using Statistical Package for the Social Sciences (SPSS) version  
19  
20  
21 20.0 (SPSS, Inc., Chicago, IL). Descriptive statistics were used to summarise information about  
22  
23  
24 respondents' reading behaviour and preferences, the impact of the CC, the nature of self-  
25  
26 reported changes to practice and characteristics of the respondents.

27  
28 Responses to questions answered along an ordinal 5-point Likert-scale were reported using the  
29  
30  
31 median and interquartile range, and dichotomised: "yes" consisted of 5 (strongly agree) and 4  
32  
33 (agree), whereas "no" consisted of 3 (neutral), 2 (disagree) and 1 (strongly disagree). The  
34  
35  
36 ordinal data was collapsed into dichotomous groups as a conservative approach to the analysis  
37  
38 using non-parametric tests. Missing data was analysed using pairwise deletion.

39  
40  
41 Cronbach's alphas were used to estimate the internal reliability of items relating to respondent  
42  
43  
44 opinion about CC content (6 items) and influence on professional practice change (4 items).

45  
46 Cronbach's alphas were estimated using the entire sample of participants.

47  
48  
49 Bivariate analysis was used to compare the characteristics of respondents who self-reported  
50  
51  
52 change in practice with those who did not. Characteristics including respondents' age, gender,  
53  
54  
55 professional role, years of experience, frequency of client interaction, practice setting, contact  
56  
57  
58 with the Coroners Court and reading behaviour, were analysed using the chi-square test.  
59  
60

1  
2  
3 Multivariate logistic regression was used to analyse factors associated with readers who  
4 reported change in practice compared to those who did not. Factors were included in the  
5 regression analysis if  $p < 0.25$  in bivariate analysis<sup>13</sup> or were thought to be important based on  
6 expert opinion of senior clinical medical and nursing staff with over 10 years' experience in  
7 medico-legal death investigations. Reference categories were selected based on the category  
8 with the largest number of people as this would be the most robust denominator. Collinearities  
9 were identified using a pairwise correlations matrix with  $r > 0.40$  interpreted as evidence of  
10 collinearity.  
11  
12  
13  
14  
15  
16  
17  
18  
19  
20  
21  
22

### 23 **Ethics Approval**

24  
25 Institutional ethics approval for this study to proceed was granted from the Victorian Institute  
26 of Forensic Medicine Research Advisory and Ethics Committee. Implicit consent for the project  
27 was considered when the study participants completed the survey.  
28  
29  
30  
31  
32  
33  
34  
35

### 36 **Results**

37  
38 Of the 3,385 listed subscribers, 3,373 had valid email addresses. Of these, an estimated 2,283  
39 subscribers opened the email containing the questionnaire. A subsequent 1,008 individuals  
40 completed the survey giving a response rate of 44.2% (1,008/2,283). All respondents provided  
41 valid responses. Cronbach's alphas demonstrated good internal consistency for opinion about  
42 CC content (0.93) and influence on practice change (0.87).  
43  
44  
45  
46  
47  
48  
49  
50

### 51 **Respondent demographic and occupational characteristics**

52  
53 The demographics of the respondents are shown in Table 1. Of the 1008 respondents, most  
54 were at or over the age of 45, the majority had worked for over 10 years, and there were more  
55  
56  
57  
58  
59  
60

1  
2  
3 females than males. The most commonly identified roles were medical practitioner or nurse. A  
4  
5 large proportion worked in clinical roles in Victorian hospitals.  
6  
7

### 8 **Respondent reading behaviour and preferences**

9  
10 The majority of respondents reported reading all or almost all of each CC issue and  
11  
12 approximately half had read all four issues of the CC. Most read the CC as soon as it arrived, and  
13  
14 a large proportion used it as a teaching aid. The section most often read was the case  
15  
16 summaries (Table 1).  
17  
18  
19

### 20 **Respondent evaluation of the CC**

21  
22 Table 2 shows the respondents' opinions on the content and efficacy of the CC. A large majority  
23  
24 agreed that the content of the CC was useful, reliable, timely, easy to understand, and written  
25  
26 in plain language. Respondents also found that the CC raised awareness and provided ideas  
27  
28 about improving patient safety and care, leading them to discuss cases with their colleagues  
29  
30 and review their practice. The case summaries and expert commentary sections were found to  
31  
32 be the most useful in aiding the respondents to improve patient care. The length of the CC was  
33  
34 regarded as *'just right'* by most of the respondents, and almost all *'would recommend the CC to*  
35  
36 *their colleagues'* (Table 2).  
37  
38  
39  
40  
41  
42

### 43 **Nature and significance of self-reported change to practice**

44  
45 496 (53.0%, 496/936) respondents reported that their practice had changed after reading the  
46  
47 CC. Details regarding the nature of practice change are shown in Table 3. The change involved  
48  
49 either individual change in practice, team-based or workplace practice. The majority of change  
50  
51 was reported to have occurred in staff, at inpatient wards, or residential aged care facilities,  
52  
53  
54  
55  
56  
57  
58  
59  
60

1  
2  
3 with respect to education and training and clinical practice, involving one or two discipline  
4  
5 groups.  
6  
7

8 Approximately one quarter of respondents reported that without the CC, change would not  
9  
10 have occurred. A larger proportion agreed that the change would have taken longer and  
11  
12 occurred on a smaller scale (Table 3).  
13

### 14 15 **Characteristics and factors associated with respondents who reported change**

16  
17 In bivariate analysis, respondents' age, professional role, and workplace location were found to  
18  
19 be significantly associated with practice change (Supplementary table 1).  
20  
21

22  
23 Multivariate analysis indicated that working in a residential aged care facility and having taken  
24  
25 part in an inquest, were significantly associated with practice change. Conversely medical  
26  
27 practitioners and pharmacists under the age of 35 years, working in workplaces with minimal  
28  
29 patient contact (less than 1 day per week) who had only read 2 or less CC issues, were less likely  
30  
31 to change their practice. The multivariate logistic regression model had a Pearson's chi-square  
32  
33 of 696.7 (d.f.=683, p=0.35) and a c-statistic of 0.72, indicating that it was a good model.  
34  
35  
36  
37  
38  
39  
40

## 41 **Discussion**

42  
43 This population-based cross-sectional study found the CC prompts readers to initiate change in  
44  
45 their professional practice to improve patient safety. With a response rate higher than the  
46  
47 predicted average rate of 20-30% for online surveys, and almost double what has been  
48  
49 described to meet stringent conditions for response rates when sampling large groups,<sup>14</sup> this  
50  
51 study adds to the existing literature on the value of electronic case summaries and  
52  
53 commentaries in reaching and influencing the practice of healthcare professionals.  
54  
55  
56  
57  
58  
59  
60

1  
2  
3 We are not aware of any other similar publications to CC, apart from our own, that have had a  
4 formal evaluation. The impact on changing practice are consistent with our previous studies<sup>9-11</sup>  
5  
6 and substantially greater than those reported in a recent Cochrane review<sup>15</sup> which found a  
7  
8 small benefit and highlighted significant variability in printed and electronic educational  
9  
10 materials' (PEM) impact on practice.  
11  
12  
13  
14

15  
16 There are many recognised benefits of PEM. The material is an effective and low cost method  
17  
18 of raising awareness. The format and layout can be tailored to appeal to a particular audience  
19  
20 to inspire behaviour change. PEM is most effective when combined with other methods, such  
21  
22 as using the influence of opinion leaders to disseminate information.<sup>16</sup>  
23  
24  
25

26 The majority of respondents were clinicians who had worked for more than 10 years,  
27  
28 suggesting that the CC appeals not only to junior staff in the early phases of their career path,  
29  
30 but also to experienced staff in senior roles. The benefits of having a readership that spans all  
31  
32 levels of seniority in a healthcare setting, is that change can take place at the frontline, in the  
33  
34 day-to-day aspects of patient care, and also at the policy-making end by staff in positions of  
35  
36 clinical and organisational leadership.  
37  
38  
39

40  
41 The reading behaviour of the respondents showed that there was an overwhelmingly positive  
42  
43 and immediate response to the release of each CC issue. Many respondents forwarded the CC  
44  
45 to their colleagues, or printed and distributed the issue in communal areas, leading to an  
46  
47 estimated reach of more than 28,000 people (Box 2). Clearly not all who read the CC will  
48  
49 become subscribers, however the scale of opportunity to raise awareness and provide ideas  
50  
51 about improving patient safety should not be underestimated. It is the very nature of raising  
52  
53 awareness that may impart the greatest benefit in influencing practice change. In this study,  
54  
55  
56  
57  
58  
59  
60

1  
2  
3 97.6% (409/419) of respondents who self-reported practice change selected 'raising awareness  
4  
5 of an issue' as directly contributing to the change.  
6  
7

8 Limited information is available from quantitative studies to understand the relationship  
9  
10 between education and change in clinical practice. Education provides one-sixth of the reasons  
11  
12 for changes in clinical practice, and is involved in one-third of the changes.<sup>17</sup> In this study, 53.0%  
13  
14 (496/936) of respondents reported a practice change after reading the CC. More than 90% of  
15  
16 respondents reported that the CC provided ideas about improving patient safety and care and  
17  
18 75.7% (715/945) of respondents had reviewed their practice. This compares favourably to an  
19  
20 earlier study where just under half (41.6%, 290/697) of responding subscribers changed their  
21  
22 practice.<sup>10</sup>  
23  
24  
25  
26  
27

28 The CC does not provide rigid guidelines. Instead it provides information that is relayed in the  
29  
30 classic human narrative form of story-telling. This is non-hierarchical and the lessons are  
31  
32 presented in context. Not only is this form of PEM thought-provoking, it stimulates dialogue  
33  
34 between colleagues. 62.4% (590/945) of respondents reported using the CC as a teaching aid,  
35  
36 suggesting they not only read it for personal interest but find the cases and topics highly  
37  
38 relevant to their work, or their work setting, team, or students, and view the material as an  
39  
40 appropriate educational resource.  
41  
42  
43  
44

45 Reading individual cases of patient deaths engenders self-reflection and self-assessment, and  
46  
47 encourages healthcare professionals to ask: can this happen to my patient?  
48  
49

50 An important finding was that a quarter of all respondents (26.0%, 109/419) attributed a  
51  
52 practice change solely to reading the CC. Of those that felt a practice change would have  
53  
54  
55  
56  
57  
58  
59  
60

1  
2  
3 occurred eventually, the majority acknowledged that the change would have been smaller and  
4  
5 taken longer.  
6  
7

8 The survey questions did not explore the extent to which 'practice change' was conceived.  
9

10 Instead, this study focused on more tangible outcomes such as projects and initiatives as  
11  
12 indicators of practice change. Subtle changes such as a change in communication, or simply  
13  
14 reflecting on a case during a patient-interaction was not asked about, but could occur on a  
15  
16 much more frequent basis and may influence practice in ways that are harder to measure.  
17  
18  
19

20 The multivariate analysis showed that residential aged care (RAC) staff were more likely to  
21  
22 make practice changes. This was an unexpected finding and may have reflected greater  
23  
24 familiarity that some RAC staff have with utilisation of the CC, through its sister publication, the  
25  
26 Residential Aged Care Communiqué (now in its tenth year of publication), and its potential to  
27  
28 facilitate change. The findings that medical practitioners and pharmacists under the age of 35  
29  
30 years and working with minimal patient contact were less likely to change their practice as a  
31  
32 result of reading the CC, may suggest that the educational relevance was not as applicable to  
33  
34 their working roles and environment. The cases were predominantly set in hospital wards, and  
35  
36 the key messages were largely centred around staff tasked with responding to an acutely  
37  
38 unwell patient.  
39  
40  
41  
42  
43  
44

45 A limitation of this study is that subscribers were asked to participate and discuss practice  
46  
47 change after only four issues had been released. Clinical guidelines can take up to three years  
48  
49 to be fully implemented.<sup>16</sup> There are many challenges to the development of clinical guidelines.  
50  
51 Failure to address the key areas of funding, clinical involvement, conflicts of interest, intended  
52  
53  
54  
55  
56  
57  
58  
59  
60

1  
2  
3 setting or audience, can all hamper the implementation of guidelines that inform practice  
4  
5 change to improve patient care.<sup>18</sup>  
6  
7

8 Another limitation of this study is that the scope did not allow the investigators to examine in  
9  
10 detail the changes that were reported, or whether the practice changes sustained over time.

11 Therefore, quantifying the risk reduction and lives saved is not possible. Pairwise deletion can  
12  
13 be a source of bias as there may be a non-random pattern of missing data.<sup>19</sup> Also, control  
14  
15 groups were not utilised.  
16  
17  
18  
19  
20  
21  
22  
23

## 24 **Conclusion**

25  
26  
27 Investigations into patient deaths identify preventable errors and enhance knowledge of the  
28  
29 many risks to patients that exist in the healthcare setting. The design and content of the CC has  
30  
31 generated a positive impact on the healthcare community. It is presented in a format that  
32  
33 appears to be accessible and acceptable to readers and achieves its goals of promoting safer  
34  
35 clinical care through greater awareness of the medico-legal context of practice.  
36  
37  
38  
39  
40  
41  
42

## 43 **Contributors**

44  
45 **JEI** contributed to conception, design and development of the study, assembly of the survey  
46  
47 and revising the manuscript critically for important intellectual content; and as senior author is  
48  
49 accountable for all aspects of the work in ensuring that questions related to the accuracy or  
50  
51 integrity of any part of the work are appropriately investigated and resolved. **NC** contributed to  
52  
53 development of the survey, was involved in drafting the manuscript and revising it critically for  
54  
55  
56  
57  
58  
59  
60

1  
2  
3 important intellectual content. **TP** performed the statistical analysis was involved in drafting the  
4 manuscript and revising it critically for important intellectual content. **BK** contributed to  
5 development of the study, was involved in revising the manuscript critically for important  
6 intellectual content. **AG** contributed to development, distribution, monitoring and collation of  
7 the survey. All authors read and approved the final manuscript.  
8  
9  
10  
11  
12  
13  
14  
15  
16  
17  
18

### 19 **Funding**

20  
21 The Victorian Managed Insurance Authority (VMIA) funded this study.  
22  
23  
24  
25  
26

### 27 **Competing interests**

28  
29 JEl and NC are directly involved in the production of the “Clinical Communiqué”. Otherwise the  
30 authors have no competing interests.  
31  
32  
33  
34  
35  
36

### 37 **References**

- 38  
39  
40  
41 1. Rafter N, Hickey A, Condell S, et al. Adverse events in healthcare: learning from  
42 mistakes. *QJM* 2015;108(4):273-277.  
43 2. McKee M, Healy J. The role of the hospital in a changing environment. *Bull World Health*  
44 *Organ* [online] 2000;78(6):803-810.  
45 3. Grol R, Wensing M. What drives change? Barriers to and incentives for achieving  
46 evidence-based practice. *Med J Aust* 2004;180(6 SUPPL.):S57-S60.  
47 4. Travaglia J, Debono D, Thoms D, Hillman K, Middleton S, Hughes C, Braithwaite J (2011).  
48 Change management strategies and practice development in nursing: a review of the  
49 literature. Sydney: Centre for Healthcare Resilience and Implementation Science,  
50 Australian Institute of Health Innovation, University of New South Wales. ISBN: 978-0-  
51 7334-3071-8.  
52 5. Cook D, Montori V, McMullin J, Finfer S, Rocker G. Improving patients' safety locally:  
53 changing clinician behaviour. *Lancet* 2004;363:1224-1230.  
54  
55  
56  
57  
58  
59  
60

- 1
  - 2
  - 3
  - 4
  - 5
  - 6
  - 7
  - 8
  - 9
  - 10
  - 11
  - 12
  - 13
  - 14
  - 15
  - 16
  - 17
  - 18
  - 19
  - 20
  - 21
  - 22
  - 23
  - 24
  - 25
  - 26
  - 27
  - 28
  - 29
  - 30
  - 31
  - 32
  - 33
  - 34
  - 35
  - 36
  - 37
  - 38
  - 39
  - 40
  - 41
  - 42
  - 43
  - 44
  - 45
  - 46
  - 47
  - 48
  - 49
  - 50
  - 51
  - 52
  - 53
  - 54
  - 55
  - 56
  - 57
  - 58
  - 59
  - 60
6. About the Clinical Communiqué. [Online] Melbourne: VIFM Communiqués; 2014 [updated 2016]; Available from: <http://www.vifmcommuniques.org/about-the-clinical-communique/>
  7. Ibrahim J, Cunningham N, O'Brien A, Charles A, Young C. The impact of a clinical team assisting the Coroner's investigation of healthcare-related deaths: reflections on six-years of service. *Leg Med* 2010;12:28-34.
  8. Australian Commission on Safety and Quality in Health Care, *National Safety and Quality Health Service Standards (September 2012)*. Sydney. ACSQHC, 2012.
  9. Ibrahim J, Ehsani J. The impact of the Coronal Communiqué on changing patient safety: a subscriber survey. *Aust Health Rev* 2009;33:583-591.
  10. Ibrahim J, Ehsani J, McInnes J. The effect of printed educational material from the coroner in Victoria, Australia, on changing aged care health professional practice: a subscriber survey. *J Am Geriatr Soc* 2010;58(3):585-591.
  11. Pham D, Ibrahim J, Kitching F, Bohensky M. Aged-care professionals' and health care professionals' self-reported impact of printed educational material on clinical practice. *J Contin Educ Health Prof* 2016;36(1):38-45.
  12. Dillman D. *Mail and telephone surveys: The Total Design Method*. New York: J Wiley; 1999.
  13. Hosmer D, Lemeshow S. *Applied logistic regression*. New York: Wiley; 1989.
  14. Nulty D. The adequacy of response rates to online and paper surveys: what can be done? *Assessment & Evaluation in Higher Education* 2008;33(3):301-314.
  15. Giguere A, Legare F, Grimshaw J, et al. Printed educational materials: effects on professional practice and healthcare outcomes. *Cochrane Database Syst Rev* 2012;10:CD004398.
  16. National Institute for Health and Clinical Excellence. (2007). *How to change practice: Understand, identify and overcome barriers to change*. London: NICE. Retrieved from: <http://www.nice.org.uk/usingguidance/implementationtools/howtoguide/barrierstochange.jsp>
  17. Allery L, Owen P, Robling M. Why general practitioners and consultants change their clinical practice: a critical incident study. *BMJ* 1997;314(7084):870-874.
  18. National Health and Medical Research Council. 2014 Annual Report on Australian Clinical Practice Guidelines. Council NHaMR. Canberra: National Health and Medical Research Council; 2014. [http://www.nhmrc.gov.au/files/nhmrc/publications/attachments/nh165\\_2014\\_nhmrc\\_clinical\\_guidelines\\_annual\\_report\\_140805.pdf](http://www.nhmrc.gov.au/files/nhmrc/publications/attachments/nh165_2014_nhmrc_clinical_guidelines_annual_report_140805.pdf)
  19. Newman D. Missing Data. *Organizational Research Methods* 2014;17(4):372-411.

## Boxes and Tables

### Box 1.

#### History of the Clinical Communiqué

The CC was launched in September 2014 as a revamped version of the Coronial Communiqué. Established in 2003, the Coronial Communiqué represented the first serial electronic publication of narrative case reports about clinical lessons learned from patient deaths investigated by the Victorian Coroner's Office.<sup>7</sup> Twenty-one editions were released before it went into a hiatus in 2009 due to resource constraints. In its current form, the CC is published quarterly and uses coronial cases from local, interstate, and international jurisdictions to explore the challenges that clinicians face every day in providing clinical care. Each issue identifies key themes that are vital to improving patient safety such as communication, supervision, decision-making, and recognising the deteriorating patient. Many of the themes are reflected in the National Safety and Quality Health Service Standards.<sup>8</sup> These are presented as case summaries and expert commentaries.

**Table 1.** Demographic and occupational characteristics and respondent reading behaviour (N=1008)

| Demographic and occupational characteristics        |                                       | n   | %    |
|-----------------------------------------------------|---------------------------------------|-----|------|
| <b>Age (years)<sup>a</sup></b>                      |                                       |     |      |
|                                                     | ≤34                                   | 101 | 11.6 |
|                                                     | 35-44                                 | 196 | 22.5 |
|                                                     | 45-54                                 | 308 | 35.3 |
|                                                     | ≥55                                   | 268 | 30.7 |
| <b>Gender<sup>a</sup></b>                           |                                       |     |      |
|                                                     | Female                                | 643 | 73.7 |
|                                                     | Male                                  | 230 | 26.3 |
| <b>Professional Role<sup>a</sup></b>                |                                       |     |      |
|                                                     | Allied Health Professional            | 25  | 2.9  |
|                                                     | Medical Practitioner                  | 240 | 27.5 |
|                                                     | Nurse                                 | 277 | 31.7 |
|                                                     | Paramedic                             | 24  | 2.7  |
|                                                     | Pharmacist                            | 35  | 4.0  |
|                                                     | Quality and Risk Manager              | 99  | 11.3 |
|                                                     | Other                                 | 173 | 19.8 |
| <b>Experience in profession (years)<sup>a</sup></b> |                                       |     |      |
|                                                     | ≤5                                    | 183 | 21.0 |
|                                                     | 6-10                                  | 130 | 14.9 |
|                                                     | 11-15                                 | 115 | 13.2 |
|                                                     | 16-20                                 | 86  | 9.9  |
|                                                     | ≥21                                   | 359 | 41.1 |
| <b>Workplace setting<sup>a</sup></b>                |                                       |     |      |
|                                                     | Government Department/Agency          | 41  | 4.7  |
|                                                     | Hospital – Acute                      | 451 | 51.7 |
|                                                     | Hospital – Subacute                   | 47  | 5.4  |
|                                                     | Primary Care                          | 72  | 8.2  |
|                                                     | Residential Aged Care Service         | 109 | 12.5 |
|                                                     | University or Other Academic          | 32  | 3.7  |
|                                                     | Other                                 | 121 | 13.9 |
| <b>State or country<sup>a</sup></b>                 |                                       |     |      |
|                                                     | Victoria                              | 549 | 62.9 |
|                                                     | Other State or Territory of Australia | 313 | 35.9 |
|                                                     | Other Country                         | 11  | 1.3  |

| <b>Frequency of patient interaction per week (days)<sup>a</sup></b>          |                                                    |          |          |
|------------------------------------------------------------------------------|----------------------------------------------------|----------|----------|
|                                                                              | Less than one                                      | 230      | 26.3     |
|                                                                              | One                                                | 58       | 6.6      |
|                                                                              | Two or three                                       | 107      | 12.3     |
|                                                                              | Four or more                                       | 478      | 54.8     |
| <b>Level of contact with Coroners Court<sup>a</sup></b>                      |                                                    |          |          |
|                                                                              | Taken part in an inquest                           | 148      | 17.0     |
|                                                                              | Provided a statement                               | 207      | 23.7     |
|                                                                              | Contacted Court to discuss if death was reportable | 338      | 38.7     |
|                                                                              | Contacted Court for other reasons                  | 289      | 33.1     |
|                                                                              | No contact                                         | 299      | 34.2     |
| <b>Respondent Reading Behaviour and Preferences</b>                          |                                                    | <b>n</b> | <b>%</b> |
| <b>Respondent reading behaviour</b>                                          |                                                    |          |          |
|                                                                              | Read all 4 issues <sup>b</sup>                     | 466      | 47.1     |
|                                                                              | Read all or almost all of each issue <sup>c</sup>  | 747      | 79.0     |
| <b>Respondents regularly read the following sections<sup>d,e</sup></b>       |                                                    |          |          |
|                                                                              | Case summaries                                     | 927      | 99.3     |
|                                                                              | Expert commentary                                  | 916      | 98.0     |
|                                                                              | Editorial                                          | 821      | 88.1     |
|                                                                              | Resources list                                     | 525      | 56.6     |
| <b>Use of the Clinical Communiqué<sup>c,e</sup></b>                          |                                                    |          |          |
|                                                                              | I read it as soon as it arrives                    | 802      | 84.9     |
|                                                                              | I encourage my colleagues to read it               | 681      | 72.1     |
|                                                                              | I refer to it in my job                            | 407      | 43.1     |
|                                                                              | I use it as a teaching aid                         | 590      | 62.4     |
| <b>Number of people with access to the Clinical Communiqué<sup>c,f</sup></b> |                                                    |          |          |
|                                                                              | Only myself                                        | 441      | 46.7     |
|                                                                              | One other person                                   | 53       | 5.6      |
|                                                                              | 3 to 5 other people                                | 124      | 13.1     |
|                                                                              | 6 to 10 other people                               | 85       | 9.0      |
|                                                                              | 11 to 20 other people                              | 73       | 7.7      |
|                                                                              | 21 to 30 other people                              | 62       | 6.6      |
|                                                                              | More than 31 other people                          | 107      | 11.3     |

<sup>a</sup>135 respondents failed to answer this question and were not included in the analysis (N=873)

<sup>b</sup>19 respondents failed to answer this question and were not included in the analysis (N=989)

<sup>c</sup>63 respondents failed to answer this question and were not included in the analysis

(N=945)

<sup>d</sup>The number of respondents varies for this question (N=934, 935, 932, 928) respectively

<sup>e</sup>Five-point Likert scale, 5=strongly agree to 1=strongly disagree. Positive responses are counted as the sum of responses that stated 'strongly agree' and 'agree'

<sup>f</sup>The reach of the CC was calculated from these results. The lower (28,575) and upper ranges (30,958) were determined by multiplying the number of respondents with the extremes of their response. Respondents who answered 'more than 31 other people' to this question were given an option to provide the actual number and where available, this response was used in the calculation

NB. Because of rounding not all percentages cumulatively sum to 100

For peer review only

**Table 2.** Respondent Evaluation Criteria (N=1008)

| Respondent Evaluation Criteria                                                                                                                                                         | n   | %    | Median (25 <sup>th</sup> - 75 <sup>th</sup> percentile) |
|----------------------------------------------------------------------------------------------------------------------------------------------------------------------------------------|-----|------|---------------------------------------------------------|
| <b>Information given in the Clinical Communiqué is:<sup>a,c</sup></b>                                                                                                                  |     |      |                                                         |
| Useful                                                                                                                                                                                 | 928 | 99.1 | 5 (4-5)                                                 |
| Reliable                                                                                                                                                                               | 907 | 96.9 | 5 (4-5)                                                 |
| Timely                                                                                                                                                                                 | 728 | 77.8 | 4 (4-5)                                                 |
| Easy to understand                                                                                                                                                                     | 912 | 97.4 | 5 (4-5)                                                 |
| Written in plain language                                                                                                                                                              | 917 | 98.0 | 5 (4-5)                                                 |
| <b>The following sections of the Clinical Communiqué are useful for improving patient care:<sup>a,c</sup></b>                                                                          |     |      |                                                         |
| Case summaries                                                                                                                                                                         | 922 | 98.5 | 5 (4-5)                                                 |
| Expert commentary                                                                                                                                                                      | 914 | 97.6 | 5 (4-5)                                                 |
| Editorial                                                                                                                                                                              | 799 | 85.4 | 4 (4-5)                                                 |
| Resources list                                                                                                                                                                         | 628 | 67.1 | 4 (3-4)                                                 |
| <b>Reading the Clinical Communiqué<sup>b,c</sup></b>                                                                                                                                   |     |      |                                                         |
| Raised awareness about improving patient safety and clinical care                                                                                                                      | 912 | 96.5 | 5 (4-5)                                                 |
| Provided ideas for improving safety and clinical care                                                                                                                                  | 889 | 94.1 | 4 (4-5)                                                 |
| Prompted me to discuss cases with colleagues                                                                                                                                           | 752 | 79.6 | 4 (4-5)                                                 |
| Prompted me to review my practice                                                                                                                                                      | 715 | 75.7 | 4 (4-4)                                                 |
| <b>The length of the Clinical Communiqué is just right<sup>a</sup></b>                                                                                                                 | 766 | 81.8 | –                                                       |
| <b>I would recommend the Clinical Communiqué to my colleagues<sup>a,d</sup></b>                                                                                                        | 927 | 99.0 | 5 (5-5)                                                 |
| <sup>a</sup> 72 respondents failed to answer this question and were excluded from analysis (N=936)                                                                                     |     |      |                                                         |
| <sup>b</sup> 63 respondents failed to answer this question and were excluded from analysis (N=945)                                                                                     |     |      |                                                         |
| <sup>c</sup> Five-point Likert scale, 5=strongly agree to 1=strongly disagree. Positive responses are counted as the sum of responses that stated 'strongly agree' and 'agree'         |     |      |                                                         |
| <sup>d</sup> Five-point Likert scale, 5 = definitely yes to 1 = definitely not. Positive responses are counted as the sum of responses that stated 'definitely yes' and 'probably yes' |     |      |                                                         |

**Table 3.** Details of self-reported change to practice (N=496)

| <b>Characteristics of practice change</b>                                              | <b>n</b> | <b>%</b> |
|----------------------------------------------------------------------------------------|----------|----------|
| <b>Workplace<sup>a</sup></b>                                                           |          |          |
| Emergency department                                                                   | 89       | 21.2     |
| Intensive care unit                                                                    | 42       | 10.0     |
| Operating theatre                                                                      | 51       | 12.2     |
| Inpatient ward                                                                         | 146      | 34.8     |
| Outpatient unit primary care                                                           | 47       | 11.2     |
| Residential aged care facility                                                         | 119      | 28.4     |
| Other                                                                                  | 92       | 22.0     |
| <b>Who was involved in the practice change?<sup>a</sup></b>                            |          |          |
| One discipline group (e.g. doctors only)                                               | 157      | 37.5     |
| Two discipline groups (e.g. doctors and nurses)                                        | 188      | 44.9     |
| Three discipline groups (e.g. doctors, nurses and pharmacists)                         | 48       | 11.5     |
| Four or more discipline groups                                                         | 38       | 9.1      |
| <b>Practice change was related to<sup>a</sup></b>                                      |          |          |
| Education and training                                                                 | 286      | 68.3     |
| Policy, procedures and protocols                                                       | 182      | 43.4     |
| Clinical practice                                                                      | 283      | 67.5     |
| Evaluation of care                                                                     | 142      | 33.9     |
| Documentation of practice                                                              | 205      | 48.9     |
| Improving staff morale/attitude                                                        | 122      | 29.1     |
| Environment/equipment                                                                  | 65       | 15.5     |
| <b>Edition of the Clinical Communiqué which influenced practice change<sup>a</sup></b> |          |          |
| 'Communiqué cases and the National Health Service Standards'                           | 124      | 29.6     |
| 'Recognising early warning signs of the deteriorating patient'                         | 341      | 81.4     |
| 'Communication and decision making at the bedside'                                     | 253      | 60.4     |
| 'Responding as a team to medical emergency'                                            | 191      | 45.6     |
| <b>The practice change had an impact on<sup>a</sup></b>                                |          |          |
| Patient care                                                                           | 339      | 80.9     |
| Staff                                                                                  | 380      | 90.7     |
| Environment                                                                            | 215      | 51.3     |
| Organisation                                                                           | 268      | 64.0     |
| <b>The action taken in the practice change was to<sup>a</sup></b>                      |          |          |
| Introduce a new initiative                                                             | 71       | 16.9     |
| Alter or modify an existing initiative                                                 | 382      | 91.2     |
| Discontinue an existing initiative                                                     | 24       | 5.7      |

**Number of initiatives where the Clinical Communiqué was used to change practice<sup>a</sup>**

|              |     |      |
|--------------|-----|------|
| One          | 151 | 36.0 |
| Two          | 175 | 41.8 |
| Three        | 63  | 15.0 |
| Four         | 12  | 2.9  |
| Five or more | 19  | 4.5  |

**Degree to which the Clinical Communiqué influenced practice change<sup>a,b</sup>**

|                                        |     |      |
|----------------------------------------|-----|------|
| Selecting area of improvement          | 306 | 73.0 |
| Defining the scope of the project      | 173 | 41.3 |
| Engaging senior management             | 189 | 45.1 |
| Engaging point of care staff           | 276 | 65.9 |
| Identifying required resources         | 203 | 48.5 |
| Setting project timelines              | 76  | 18.1 |
| Gathering background research/analysis | 227 | 54.2 |

**The Clinical Communiqué influenced practice change<sup>a,c</sup>**

|                                                        |     |      |
|--------------------------------------------------------|-----|------|
| By raising awareness of an issue                       | 409 | 97.6 |
| By engaging staff                                      | 354 | 84.5 |
| Because of the authority of the publication            | 310 | 74.0 |
| By suggesting improvement strategies                   | 359 | 85.7 |
| By prompting staff to evaluate their existing practice | 369 | 88.1 |

**If the Clinical Communiqué had not been available, the change would have<sup>a,c</sup>**

|                             |     |      |
|-----------------------------|-----|------|
| Happened anyway             | 129 | 30.8 |
| Taken longer                | 347 | 82.8 |
| Happened on a smaller scale | 236 | 56.3 |
| Not occurred                | 109 | 26.0 |

<sup>a</sup>77 respondents failed to answer this question and were excluded from analysis (N=419)

<sup>b</sup>Five-point Likert scale, 5=strongly agree to 1=strongly disagree. Positive responses are counted as the sum of responses that stated 'strongly agree' and 'agree'

<sup>c</sup>Five-point Likert scale, 5=extremely influential to 1=not at all influential. Positive responses are counted as the sum of responses that stated 'extremely influential' and 'very influential'

**Box 2.****Reach of the Clinical Communiqué**

As the CC is delivered via email, it is difficult to determine exactly how many people are being exposed to the contents of the CC. Therefore by asking respondents how many people have access to the CC at their workplace, it was calculated that for this sample of 1,008 respondents, the CC reached between 28,575 and 30,958 people. Therefore, each person on average, shared the CC with at least 9 other people.

Peer review only

| Characteristic                                                   | Changed practice |      | Did not change practice |      | Multivariate odds ratio (95% confidence interval) | Chi-Square | p-value (bivariate) |
|------------------------------------------------------------------|------------------|------|-------------------------|------|---------------------------------------------------|------------|---------------------|
|                                                                  | n                | %    | n                       | %    |                                                   |            |                     |
| <b>Age (years)<sup>a</sup></b>                                   |                  |      |                         |      |                                                   |            |                     |
| 45-54                                                            | 160              | 52.8 | 143                     | 47.2 | 1.00                                              |            |                     |
| <35                                                              | 29               | 29.0 | 71                      | 71.0 | 0.45 (0.27-0.77)*                                 |            |                     |
| 35-44                                                            | 110              | 57.3 | 82                      | 42.7 | 1.48 (0.99-2.22)                                  |            |                     |
| >54                                                              | 118              | 45.0 | 144                     | 55.0 | 0.72 (0.50-1.04)                                  | 24.36      | <0.01               |
| <b>Gender<sup>a</sup></b>                                        |                  |      |                         |      |                                                   |            |                     |
| Female                                                           | 316              | 44.3 | 313                     | 55.7 | 1.00                                              |            |                     |
| Male                                                             | 101              | 44.3 | 127                     | 49.8 | 0.80 (0.55-1.17)                                  | 2.36       | 0.12                |
| <b>Professional role<sup>a</sup></b>                             |                  |      |                         |      |                                                   |            |                     |
| Nurse                                                            | 155              | 57.4 | 115                     | 42.6 | 1.00                                              |            |                     |
| Allied health                                                    | 24               | 50.0 | 24                      | 50.0 | 1.28 (0.63-2.62)                                  |            |                     |
| Medical practitioner                                             | 95               | 40.4 | 140                     | 59.6 | 0.49 (0.31-0.77)*                                 |            |                     |
| Pharmacist                                                       | 5                | 14.3 | 30                      | 85.7 | 0.15 (0.05-0.40)*                                 |            |                     |
| Quality and risk manager                                         | 55               | 56.1 | 43                      | 43.9 | 1.07 (0.61-1.87)                                  |            |                     |
| Other                                                            | 83               | 48.5 | 88                      | 51.5 | 1.03 (0.65-1.64)                                  | 33.42      | <0.01               |
| <b>Years of experience<sup>a</sup></b>                           |                  |      |                         |      |                                                   |            |                     |
| <6                                                               | 81               | 45.0 | 99                      | 55.0 |                                                   |            |                     |
| 6-10                                                             | 54               | 41.5 | 76                      | 58.5 |                                                   |            |                     |
| 11-15                                                            | 50               | 44.6 | 62                      | 55.4 |                                                   |            |                     |
| 16-20                                                            | 51               | 68.0 | 24                      | 32.0 |                                                   |            |                     |
| >20                                                              | 181              | 51.7 | 169                     | 48.3 | †                                                 | 10.01      | 0.04                |
| <b>Workplace location<sup>a</sup></b>                            |                  |      |                         |      |                                                   |            |                     |
| Hospital                                                         | 238              | 48.4 | 254                     | 51.6 | 1.00                                              |            |                     |
| Government department                                            | 16               | 39.0 | 25                      | 61.0 | 0.81 (0.38-1.72)                                  |            |                     |
| Primary care                                                     | 36               | 52.2 | 33                      | 47.8 | 1.18 (0.68-2.02)                                  |            |                     |
| Residential aged care service                                    | 75               | 70.1 | 32                      | 29.9 | 1.95 (1.18-3.24)*                                 |            |                     |
| Other                                                            | 52               | 35.1 | 96                      | 64.9 | 0.48 (0.31-0.75)*                                 | 32.39      | <0.01               |
| <b>Frequency of patient contact (times per week)<sup>a</sup></b> |                  |      |                         |      |                                                   |            |                     |
| Four or more                                                     | 240              | 51.2 | 229                     | 48.8 | 1.00                                              |            |                     |
| Less than one                                                    | 92               | 40.7 | 134                     | 59.3 | 0.51 (0.33-0.81)*                                 |            |                     |
| One                                                              | 32               | 56.1 | 25                      | 43.9 | 1.03 (0.54-1.95)                                  |            |                     |
| Two or three                                                     | 53               | 50.5 | 52                      | 49.5 | 0.83 (0.52-1.33)                                  | 8.32       | 0.04                |

|                                                                                                                                                                                                                 |     |      |     |      |                   |       |       |  |
|-----------------------------------------------------------------------------------------------------------------------------------------------------------------------------------------------------------------|-----|------|-----|------|-------------------|-------|-------|--|
| <b>Level of contact with the Coroners Court<sup>a</sup></b>                                                                                                                                                     |     |      |     |      |                   |       |       |  |
| Has not taken part in an inquest                                                                                                                                                                                | 331 | 46.6 | 380 | 53.4 | 1.00              |       |       |  |
| Taken part in an inquest                                                                                                                                                                                        | 86  | 58.9 | 60  | 41.1 | 1.92 (1.24-2.98)* | 7.40  | <0.01 |  |
| Has not provided a statement                                                                                                                                                                                    | 315 | 48.3 | 337 | 51.7 |                   |       |       |  |
| Provided a statement                                                                                                                                                                                            | 102 | 49.8 | 103 | 50.2 | ‡                 | 0.13  | 0.72  |  |
| Has not contacted court to discuss if death was reportable                                                                                                                                                      | 243 | 46.5 | 280 | 53.5 | 1.00              |       |       |  |
| Contacted court to discuss if death was reportable                                                                                                                                                              | 174 | 52.1 | 160 | 47.9 | 1.15 (0.77-1.70)  | 2.59  | 0.11  |  |
| Has not contacted court for other reasons                                                                                                                                                                       | 258 | 45.3 | 312 | 54.7 | 1.00              |       |       |  |
| Contacted court for other reasons                                                                                                                                                                               | 159 | 55.4 | 128 | 44.6 | 1.33 (0.93-1.91)  | 7.85  | <0.01 |  |
| Has had some form of contact with the Coroners Court                                                                                                                                                            | 292 | 51.5 | 275 | 48.5 | 1.00              |       |       |  |
| No contact with the Coroners Court                                                                                                                                                                              | 125 | 43.1 | 165 | 56.9 | 0.97 (0.65-1.47)  | 5.41  | 0.02  |  |
| <b>Number of editions read<sup>b</sup></b>                                                                                                                                                                      |     |      |     |      |                   |       |       |  |
| All (4)                                                                                                                                                                                                         | 270 | 59.0 | 188 | 41.0 | 1.00              |       |       |  |
| Some (1 or 2)                                                                                                                                                                                                   | 63  | 41.4 | 89  | 58.6 | 0.52 (0.34-0.81)* |       |       |  |
| At least half (2 or 3)                                                                                                                                                                                          | 163 | 50.0 | 163 | 50.0 | 0.70 (0.53-1.02)  | 15.84 | <0.01 |  |
| <b>Amount of an issue read (pages)<sup>c</sup></b>                                                                                                                                                              |     |      |     |      |                   |       |       |  |
| All or almost all (4-6)                                                                                                                                                                                         | 418 | 56.5 | 322 | 43.5 | 1.00              |       |       |  |
| Less than half (<3)                                                                                                                                                                                             | 18  | 39.1 | 28  | 60.9 | 0.71 (0.33-1.52)  |       |       |  |
| Half (3)                                                                                                                                                                                                        | 60  | 40.0 | 90  | 60.0 | 0.71 (0.47-1.07)  | 17.34 | <0.01 |  |
| <sup>a</sup> 135 respondents failed to answer this question and were not included in the analysis (N=873)                                                                                                       |     |      |     |      |                   |       |       |  |
| <sup>b</sup> 19 respondents failed to answer this question and were not included in the analysis. 16 respondents had not read any editions and were unable to answer the question about practice change (N=973) |     |      |     |      |                   |       |       |  |
| <sup>c</sup> 63 respondents failed to answer this question and were not included in the analysis (N=945)                                                                                                        |     |      |     |      |                   |       |       |  |
| p<0.05*                                                                                                                                                                                                         |     |      |     |      |                   |       |       |  |
| ‡Variable dropped as p>0.25                                                                                                                                                                                     |     |      |     |      |                   |       |       |  |
| †Variable dropped due to collinearity with age (r=0.41)                                                                                                                                                         |     |      |     |      |                   |       |       |  |

STROBE Statement—Checklist of items that should be included in reports of *cross-sectional studies*

|                              | Item No | Recommendation                                                                                                                                                                                                                                                                                  |                            |
|------------------------------|---------|-------------------------------------------------------------------------------------------------------------------------------------------------------------------------------------------------------------------------------------------------------------------------------------------------|----------------------------|
| <b>Title and abstract</b>    | 1       | (a) Indicate the study's design with a commonly used term in the title or the abstract                                                                                                                                                                                                          | Comment [TP1]: Completed.  |
|                              |         | (b) Provide in the abstract an informative and balanced summary of what was done and what was found                                                                                                                                                                                             | Comment [TP2]: Completed.  |
| <b>Introduction</b>          |         |                                                                                                                                                                                                                                                                                                 |                            |
| Background/rationale         | 2       | Explain the scientific background and rationale for the investigation being reported                                                                                                                                                                                                            | Comment [TP3]: Completed.  |
| Objectives                   | 3       | State specific objectives, including any prespecified hypotheses                                                                                                                                                                                                                                | Comment [TP4]: Completed.  |
| <b>Methods</b>               |         |                                                                                                                                                                                                                                                                                                 |                            |
| Study design                 | 4       | Present key elements of study design early in the paper                                                                                                                                                                                                                                         | Comment [TP5]: Completed.  |
| Setting                      | 5       | Describe the setting, locations, and relevant dates, including periods of recruitment, exposure, follow-up, and data collection                                                                                                                                                                 | Comment [TP6]: Completed.  |
| Participants                 | 6       | (a) Give the eligibility criteria, and the sources and methods of selection of participants                                                                                                                                                                                                     | Comment [TP7]: Completed.  |
| Variables                    | 7       | Clearly define all outcomes, exposures, predictors, potential confounders, and effect modifiers. Give diagnostic criteria, if applicable                                                                                                                                                        | Comment [TP8]: Completed.  |
| Data sources/<br>measurement | 8*      | For each variable of interest, give sources of data and details of methods of assessment (measurement). Describe comparability of assessment methods if there is more than one group                                                                                                            | Comment [TP9]: Completed.  |
| Bias                         | 9       | Describe any efforts to address potential sources of bias                                                                                                                                                                                                                                       | Comment [TP10]: Completed. |
| Study size                   | 10      | Explain how the study size was arrived at                                                                                                                                                                                                                                                       | Comment [TP11]: Completed. |
| Quantitative variables       | 11      | Explain how quantitative variables were handled in the analyses. If applicable, describe which groupings were chosen and why                                                                                                                                                                    | Comment [TP12]: Completed. |
| Statistical methods          | 12      | (a) Describe all statistical methods, including those used to control for confounding                                                                                                                                                                                                           | Comment [TP13]: Completed. |
|                              |         | (b) Describe any methods used to examine subgroups and interactions                                                                                                                                                                                                                             |                            |
|                              |         | (c) Explain how missing data were addressed                                                                                                                                                                                                                                                     |                            |
|                              |         | (d) If applicable, describe analytical methods taking account of sampling strategy                                                                                                                                                                                                              |                            |
|                              |         | (e) Describe any sensitivity analyses                                                                                                                                                                                                                                                           |                            |
| <b>Results</b>               |         |                                                                                                                                                                                                                                                                                                 |                            |
| Participants                 | 13*     | (a) Report numbers of individuals at each stage of study—eg numbers potentially eligible, examined for eligibility, confirmed eligible, included in the study, completing follow-up, and analysed<br>(b) Give reasons for non-participation at each stage<br>(c) Consider use of a flow diagram | Comment [TP14]: Completed. |
| Descriptive data             | 14*     | (a) Give characteristics of study participants (eg demographic, clinical, social) and information on exposures and potential confounders                                                                                                                                                        | Comment [TP15]: Completed. |
|                              |         | (b) Indicate number of participants with missing data for each variable of interest                                                                                                                                                                                                             |                            |
| Outcome data                 | 15*     | Report numbers of outcome events or summary measures                                                                                                                                                                                                                                            | Comment [TP16]: Completed  |
| Main results                 | 16      | (a) Give unadjusted estimates and, if applicable, confounder-adjusted estimates and their precision (eg, 95% confidence interval). Make clear which confounders were adjusted for and why they were included                                                                                    | Comment [TP17]: Completed  |
|                              |         | (b) Report category boundaries when continuous variables were categorized                                                                                                                                                                                                                       |                            |
|                              |         | (c) If relevant, consider translating estimates of relative risk into absolute risk for                                                                                                                                                                                                         |                            |

|                          |    |                                                                                                                                                                            |                            |
|--------------------------|----|----------------------------------------------------------------------------------------------------------------------------------------------------------------------------|----------------------------|
|                          |    | a meaningful time period                                                                                                                                                   |                            |
| Other analyses           | 17 | Report other analyses done—eg analyses of subgroups and interactions, and sensitivity analyses                                                                             | Comment [TP18]: Completed. |
| <b>Discussion</b>        |    |                                                                                                                                                                            |                            |
| Key results              | 18 | Summarise key results with reference to study objectives                                                                                                                   | Comment [TP19]: Completed. |
| Limitations              | 19 | Discuss limitations of the study, taking into account sources of potential bias or imprecision. Discuss both direction and magnitude of any potential bias                 | Comment [TP20]: Completed. |
| Interpretation           | 20 | Give a cautious overall interpretation of results considering objectives, limitations, multiplicity of analyses, results from similar studies, and other relevant evidence | Comment [TP21]: Completed. |
| Generalisability         | 21 | Discuss the generalisability (external validity) of the study results                                                                                                      | Comment [TP22]: Completed. |
| <b>Other information</b> |    |                                                                                                                                                                            |                            |
| Funding                  | 22 | Give the source of funding and the role of the funders for the present study and, if applicable, for the original study on which the present article is based              | Comment [TP23]: Completed. |

\*Give information separately for exposed and unexposed groups.

**Note:** An Explanation and Elaboration article discusses each checklist item and gives methodological background and published examples of transparent reporting. The STROBE checklist is best used in conjunction with this article (freely available on the Web sites of PLoS Medicine at <http://www.plosmedicine.org/>, Annals of Internal Medicine at <http://www.annals.org/>, and Epidemiology at <http://www.epidem.com/>). Information on the STROBE Initiative is available at [www.strobe-statement.org](http://www.strobe-statement.org).

# BMJ Open

**A cross-sectional survey using electronic distribution of a questionnaire to subscribers of educational material written by clinicians, for clinicians, to evaluate whether practice change resulted from reading the Clinical Communiqué**

|                                 |                                                                                                                                                                                                                                                                                                                                                                      |
|---------------------------------|----------------------------------------------------------------------------------------------------------------------------------------------------------------------------------------------------------------------------------------------------------------------------------------------------------------------------------------------------------------------|
| Journal:                        | <i>BMJ Open</i>                                                                                                                                                                                                                                                                                                                                                      |
| Manuscript ID                   | bmjopen-2016-014064.R2                                                                                                                                                                                                                                                                                                                                               |
| Article Type:                   | Research                                                                                                                                                                                                                                                                                                                                                             |
| Date Submitted by the Author:   | 14-Mar-2017                                                                                                                                                                                                                                                                                                                                                          |
| Complete List of Authors:       | Cunningham, Nicola; Monash University, Department of Forensic Medicine<br>Pham, Tony; Monash University, Department of Forensic Medicine<br>Kennedy, Briohny; Monash University, Department of Forensic Medicine<br>Gillard, Alexander; Monash University, Department of Forensic Medicine<br>Ibrahim, Joseph E.; Monash University, Department of Forensic Medicine |
| <b>Primary Subject Heading</b>: | Medical education and training                                                                                                                                                                                                                                                                                                                                       |
| Secondary Subject Heading:      | Legal and forensic medicine                                                                                                                                                                                                                                                                                                                                          |
| Keywords:                       | Coroners, Practice change, Printed educational material, patient safety, narrative case reports, death prevention                                                                                                                                                                                                                                                    |
|                                 |                                                                                                                                                                                                                                                                                                                                                                      |

SCHOLARONE™  
Manuscripts

1  
2  
3 **A cross-sectional survey using electronic distribution of a questionnaire to subscribers of**  
4  
5 **educational material written by clinicians, for clinicians, to evaluate whether practice change**  
6  
7 **resulted from reading the Clinical Communiqué**  
8  
9

10  
11  
12  
13  
14  
15  
16 **Dr. Nicola Cunningham<sup>1</sup>, Mr. Tony Pham<sup>1</sup>, Ms. Briohny Kennedy<sup>1</sup>, Mr. Alexander Gillard<sup>1</sup>,**  
17  
18 **Prof. Joseph Ibrahim<sup>1</sup>**  
19

20  
21  
22  
23 **<sup>1</sup>Department of Forensic Medicine, Monash University, 65 Kavanagh Street, Southbank,**  
24  
25 **Victoria 3006, Australia**  
26  
27

28  
29  
30  
31 **Corresponding Author:**

32 Joseph E Ibrahim

33  
34  
35  
36 Department of Forensic Medicine, Monash University, 65 Kavanagh Street, Southbank, Victoria  
37  
38 3006, Australia

39  
40  
41 Telephone number: +61 3 9903 0555

42  
43 Fax number: +61 3 9682 7353

44  
45  
46 Email address: [joseph.ibrahim@monash.edu](mailto:joseph.ibrahim@monash.edu)  
47  
48

49  
50  
51 **Word count: 2896**  
52  
53  
54  
55  
56  
57  
58  
59  
60

## Abstract

**Objective:** To explore whether subscribers reported clinical practice changes as a result of reading the Clinical Communiqué (CC). Secondly, to compare the characteristics of subscribers who self-reported changes to clinical practice with those who did not, and to explore subscribers' perceptions of the educational value of the CC.

**Design, setting and participants:** Online cross-sectional survey between 21<sup>st</sup> July 2015 to 18<sup>th</sup> August 2015 by subscribers of the CC (response rate=30.0%, 1,008/3,373), conducted by a team from Monash University, Australia.

**Main outcome measures:** Change in clinical practice as a result of reading the CC.

**Results:** 53.0% of respondents reported that their practice had changed after reading the CC. Respondents also found that the CC raised awareness (96.5%) and provided ideas about improving patient safety and care (94.1%) leading them to discuss cases with their colleagues (79.6%) and review their practice (75.7%). Multivariate analysis indicated that working in a residential aged care facility ( $p<0.05$ ) and having taken part in an inquest ( $p<0.05$ ), were significantly associated with practice change.

**Conclusion:** The design and content of the CC has generated a positive impact on the healthcare community. It is presented in a format that appears to be accessible and acceptable to readers and achieves its goals of promoting safer clinical care through greater awareness of the medico-legal context of practice.

**Strengths and limitations of this study**

- This study evaluates the effect that the Clinical Communiqué (CC) has on its readers in terms of practice change
- There was a substantial number of respondents with over 1000 subscribers participating in the survey
- The response rate (30%) is higher than that which is usually obtained in online surveys (20%)
- The self-reported change to practice of 53.0% is likely an overestimate, however, there is substantive corroboration with 109 subscribers (13%) agreeing 'that if CC was not available, change would not have occurred'
- A control group was not used in our study

## Introduction

Throughout the developed world, it has been estimated that about 10% of hospital admissions are associated with an adverse event.<sup>1</sup> The examination of adverse events in healthcare settings is a tool whereby practical information can be generated to stimulate incentives for change at many levels. However, clinical behaviour is notoriously resistant to change.<sup>2</sup> At an individual level, barriers to (and incentives for) change include: awareness, knowledge, attitude, motivation, and behavioural routines.<sup>3</sup> Systemic organisational factors include change fatigue, resource limitations, restructuring and workplace culture.<sup>4</sup>

Adverse events and patient harm in healthcare settings occur through errors of commission or errors of omission. Errors of commission often manifest as single high-profile catastrophic events, whereas, errors of omission may be more pervasive and difficult to identify.<sup>5</sup> The latter often require careful evaluation to reveal the interplay between remote or unseen factors that may have led to the errors.

In the pursuit of improving patient safety, medico-legal death investigations in healthcare settings can allow for identification of areas suitable for change. Inquests provide a forum within which a coroner conducts a detailed analysis of events that contributed to a patient's death. Errors are explored and questions of 'why', 'what', 'where', and 'who' in relation to practice change can be addressed in the coroner's comments and recommendations.

Accessibility of this information to healthcare professionals may be limited by the legal format and technical language of coronial findings. The Clinical Communiqué (CC) is an electronic educational publication that encourages practice reflection and change by providing coronial information regarding preventable deaths in acute hospital and community settings. In order to

1  
2  
3 optimize the impact and dissemination of this important information, a relevant clinical context  
4  
5  
6 is combined with accessible language and up-to-date expertise (Box 1). The CC contains  
7  
8  
9 narrative case reports about lessons learned from coroners' investigations and its target  
10  
11 audience is healthcare professionals, clinicians and managers.<sup>6</sup>  
12

## 13 14 **Aim**

15  
16  
17 The primary aim of this study was to explore whether subscribers reported clinical practice  
18  
19 changes as a result of reading the CC. It also compared the characteristics of subscribers who  
20  
21 self-reported changes to clinical practice with those who did not, and explores subscribers'  
22  
23 perceptions of the educational value of the CC.  
24  
25  
26  
27  
28

## 29 30 **Method**

### 31 32 **Study Design and Setting**

33  
34  
35 A population-based cross-sectional study was conducted, using an anonymous electronic survey  
36  
37 distributed to all registered subscribers of the Clinical Communiqué (CC). A team from the  
38  
39 Monash University, Australia, conducted the survey from July to September in 2015.  
40  
41

### 42 43 **Survey Instrument**

44  
45 The survey instrument was refined from previous studies to address the study objectives.<sup>9-11</sup>  
46

47  
48 This involved the refinement of the questionnaire through the changing of phrasing, the  
49  
50 addition of new questions and the modification of previous questions by researchers with  
51  
52 extensive knowledge of the health care system to make clear the premise of each item within  
53  
54 the questionnaire. The questionnaire was then piloted with ten health professionals (five  
55  
56  
57  
58  
59  
60

1  
2  
3 nurses and five doctors) and after reviewing the feedback, the survey was further refined. The  
4  
5 final questionnaire was designed and distributed through the web-based application Survey  
6  
7  
8 Monkey.  
9

10  
11 The questionnaire consisted of 33 questions divided into three sections: respondent reading  
12  
13 behaviour and evaluation of the CC (10 questions); the impact of the CC, including details of  
14  
15 practice change (13 questions); and respondent characteristics (10 questions). A change in  
16  
17 practice required the respondent to identify the following elements: location (e.g. inpatient  
18  
19 ward), discipline involved (e.g. medical staff), nature (e.g. education, policy, clinical care),  
20  
21 edition of the CC that influenced change, impact on subject (e.g. patient, staff), and action  
22  
23 taken (e.g. new initiative). The survey instrument consisted of closed-ended questions, of which  
24  
25 six allowed respondents the opportunity to provide further detail if the 'other' option was  
26  
27 selected from the multiple choices. The closed-ended questions were multiple choice,  
28  
29 categorical, dichotomous, and Likert-type questions with 5 point rating scales.  
30  
31  
32  
33  
34

35  
36 Only respondents who reported changing practice after reading the CC were able to answer  
37  
38 questions about changes in professional practice. No identifying data was collected.  
39  
40

### 41 **Study Population**

42  
43 The survey was sent out via email by study investigator through the MailChimp service to all  
44  
45 registered subscribers of the CC at the time the study was conducted, and for whom an email  
46  
47 address was available. A modified Dillman protocol<sup>12</sup> was used to guide subscriber  
48  
49 participation. Subscribers were contacted directly via email and asked to respond to the survey  
50  
51 on 21 July, 2015. Two weeks later, a follow-up reminder email was sent to subscribers and a  
52  
53 final reminder email was sent after a further two weeks. Respondent anonymity was  
54  
55  
56  
57  
58  
59  
60

1  
2  
3 maintained and the researchers blinded by using the web-based survey tool for collection and  
4  
5 collation of data. The electronic system automatically identified the non-responders and  
6  
7  
8 reminder notices were only sent to subscribers who had not responded to the previous  
9  
10  
11 email(s). The Survey Monkey settings were set to refuse multiple responses from the same IP  
12  
13  
14 address.

### 15 16 **Data Analysis**

17  
18 Survey responses were analysed using Statistical Package for the Social Sciences (SPSS) version  
19  
20  
21 20.0 (SPSS, Inc., Chicago, IL). Descriptive statistics were used to summarise information about  
22  
23  
24 respondents' reading behaviour and preferences, the impact of the CC, the nature of self-  
25  
26  
27 reported changes to practice and characteristics of the respondents.

28  
29 Responses to questions answered along an ordinal 5-point Likert-scale were reported using the  
30  
31  
32 median and interquartile range, and dichotomised: "yes" consisted of 5 (strongly agree) and 4  
33  
34  
35 (agree), whereas "no" consisted of 3 (neutral), 2 (disagree) and 1 (strongly disagree). The  
36  
37  
38 ordinal data was collapsed into dichotomous groups as a conservative approach to the analysis  
39  
40  
41 using non-parametric tests. Missing data was analysed using pairwise deletion.

42  
43 Cronbach's alphas were used to estimate the internal reliability of items relating to respondent  
44  
45  
46 opinion about CC content (6 items) and influence on professional practice change (4 items).

47  
48 Cronbach's alphas were estimated using the entire sample of participants.

49  
50 Bivariate analysis was used to compare the characteristics of respondents who self-reported  
51  
52  
53 change in practice with those who did not. Characteristics including respondents' age, gender,  
54  
55  
56 professional role, years of experience, frequency of client interaction, practice setting, contact  
57  
58  
59 with the Coroners Court and reading behaviour, were analysed using the chi-square test.  
60

1  
2  
3  
4  
5  
6  
7  
8  
9  
10  
11  
12  
13  
14  
15  
16  
17  
18  
19  
20  
21  
22  
23  
24  
25  
26  
27  
28  
29  
30  
31  
32  
33  
34  
35  
36  
37  
38  
39  
40  
41  
42  
43  
44  
45  
46  
47  
48  
49  
50  
51  
52  
53  
54  
55  
56  
57  
58  
59  
60

Multivariate logistic regression was used to analyse factors associated with readers who reported change in practice compared to those who did not. Factors were included in the regression analysis if  $p < 0.25$  in bivariate analysis<sup>13</sup> or were thought to be important based on expert opinion of senior clinical medical and nursing staff with over 10 years' experience in medico-legal death investigations. Reference categories were selected based on the category with the largest number of people as this would be the most robust denominator. Collinearities were identified using a pairwise correlations matrix with  $r > 0.40$  interpreted as evidence of collinearity.

Non-response bias was analysed by comparing demographical data of survey respondents with that of the 'register to subscribe' database of the CC. Since all subscribers were surveyed, differences between the two groups were used to derive non-respondent data. Non-respondent and respondent demographics (gender, age, professional role) were analysed by comparing proportions.

### **Ethics Approval**

Institutional ethics approval for this study to proceed was granted from the Victorian Institute of Forensic Medicine Research Advisory and Ethics Committee. Implicit consent for the project was considered when the study participants completed the survey.

### **Results**

Of the 3,385 listed subscribers, 3,373 had valid email addresses. 1,008 individuals completed the survey giving a response rate of 30.0% (1,008/3,373). All respondents provided valid

1  
2  
3 responses. Cronbach's alphas demonstrated good internal consistency for opinion about CC  
4  
5 content (0.93) and influence on practice change (0.87).  
6  
7

### 8 9 **Respondent demographic and occupational characteristics**

10  
11 The demographics of the respondents are shown in Table 1. Of the 1,008 respondents, most  
12  
13 were at or over the age of 45, the majority had worked for over 10 years, and there were more  
14  
15 females than males. The most commonly identified roles were medical practitioner or nurse. A  
16  
17 large proportion worked in clinical roles in Victorian hospitals.  
18  
19

### 20 21 **Respondent reading behaviour and preferences**

22  
23 The majority of respondents reported reading all or almost all of each CC issue and  
24  
25 approximately half had read all four issues of the CC. Most read the CC as soon as it arrived, and  
26  
27 a large proportion used it as a teaching aid. The section most often read was the case  
28  
29 summaries (Table 1).  
30  
31

### 32 33 **Respondent evaluation of the CC**

34  
35 Table 2 shows the respondents' opinions on the content and efficacy of the CC. A large majority  
36  
37 agreed that the content of the CC was useful, reliable, timely, easy to understand, and written  
38  
39 in plain language. Respondents also found that the CC raised awareness and provided ideas  
40  
41 about improving patient safety and care, leading them to discuss cases with their colleagues  
42  
43 and review their practice. The case summaries and expert commentary sections were found to  
44  
45 be the most useful in aiding the respondents to improve patient care. The length of the CC was  
46  
47 regarded as *'just right'* by most of the respondents, and almost all *'would recommend the CC to*  
48  
49 *their colleagues'* (Table 2).  
50  
51  
52  
53  
54

### 55 56 **Nature and significance of self-reported change to practice**

1  
2  
3 496 (53.0%, 496/936) respondents reported that their practice had changed after reading the  
4  
5  
6 CC. Details regarding the nature of practice change are shown in Table 3. The change involved  
7  
8 either individual change in practice, team-based or workplace practice. The majority of change  
9  
10 was reported to have occurred in staff, at inpatient wards, or residential aged care facilities,  
11  
12 with respect to education and training and clinical practice, involving one or two discipline  
13  
14 groups.  
15  
16

17  
18 Approximately one quarter of respondents reported that without the CC, change would not  
19  
20 have occurred. A larger proportion agreed that the change would have taken longer and  
21  
22 occurred on a smaller scale (Table 3).  
23  
24

### 25 26 **Characteristics and factors associated with respondents who reported change**

27  
28 In bivariate analysis, respondents' age, professional role, and workplace location were found to  
29  
30 be significantly associated with practice change ( $p < 0.05$ ) (Supplementary table 1).  
31  
32

33  
34 Multivariate analysis indicated that working in a residential aged care facility and having taken  
35  
36 part in an inquest, were significantly associated with practice change ( $p < 0.05$ ). Conversely  
37  
38 medical practitioners and pharmacists under the age of 35 years, working in workplaces with  
39  
40 minimal patient contact (less than 1 day per week) who had only read 2 or less CC issues, were  
41  
42 less likely to change their practice ( $p < 0.05$ ). The multivariate logistic regression model had a  
43  
44 Pearson's chi-square of 696.7 (d.f.=683,  $p = 0.35$ ) and a c-statistic of 0.72, indicating that it was a  
45  
46 good model (c-statistic between 0.70 and 0.80).<sup>13</sup>  
47  
48  
49  
50  
51

## 52 53 **Discussion**

54  
55  
56  
57  
58  
59  
60

1  
2  
3 This population-based cross-sectional study found the CC prompts readers to initiate change in  
4 their professional practice to improve patient safety. With a response rate at the higher end of  
5 the predicted average rate of 20-30% for online surveys, and higher than what has been  
6 described to meet stringent conditions for response rates when sampling large groups,<sup>14</sup> this  
7 study adds to the existing literature<sup>9-11,15</sup> on the value of electronic case summaries and  
8 commentaries in reaching and influencing the practice of healthcare professionals.  
9

10  
11 We are not aware of any other similar publications to the CC, apart from our own, that have  
12 had a formal evaluation. The impact on changing practice are consistent with our previous  
13 studies<sup>9-11</sup> and substantially greater than those reported in a recent Cochrane review<sup>15</sup> which  
14 found a small benefit and highlighted significant variability in printed and electronic educational  
15 materials' (PEM) impact on practice.  
16  
17

18  
19 There are many recognised benefits of PEM. The material is an effective and low cost method  
20 of raising awareness. The format and layout can be tailored to appeal to a particular audience  
21 to inspire behaviour change. PEM is most effective when combined with other methods, such  
22 as using the influence of opinion leaders to disseminate information.<sup>16</sup>  
23  
24

25  
26 The majority of respondents were clinicians who had worked for more than 10 years,  
27 suggesting that the CC appeals not only to junior staff in the early phases of their career path,  
28 but also to experienced staff in senior roles. The benefits of having a readership that spans all  
29 levels of seniority in a healthcare setting, is that change can take place at the frontline, in the  
30 day-to-day aspects of patient care, and also at the policy-making end by staff in positions of  
31 clinical and organisational leadership.  
32  
33  
34  
35  
36  
37  
38  
39  
40  
41  
42  
43  
44  
45  
46  
47  
48  
49  
50  
51  
52  
53  
54  
55  
56  
57  
58  
59  
60

1  
2  
3 The reading behaviour of the respondents showed that there was an overwhelmingly positive  
4 and immediate response to the release of each CC issue. Many respondents forwarded the CC  
5  
6 to their colleagues, or printed and distributed the issue in communal areas, leading to an  
7  
8 estimated reach of more than 28,000 people (Box 2). Clearly not all who read the CC will  
9  
10 become subscribers, however the scale of opportunity to raise awareness and provide ideas  
11  
12 about improving patient safety should not be underestimated. It is the very nature of raising  
13  
14 awareness that may impart the greatest benefit in influencing practice change. In this study,  
15  
16 97.6% (409/419) of respondents who self-reported practice change selected 'raising awareness  
17  
18 of an issue' as directly contributing to the change.  
19  
20

21  
22 Limited information is available from quantitative studies to understand the relationship  
23  
24 between education and change in clinical practice. Education provides one-sixth of the reasons  
25  
26 for changes in clinical practice, and is involved in one-third of the changes.<sup>17</sup> In this study, 53.0%  
27  
28 (496/936) of respondents reported a practice change after reading the CC. More than 90% of  
29  
30 respondents reported that the CC provided ideas about improving patient safety and care and  
31  
32 75.7% (715/945) of respondents had reviewed their practice. This compares favourably to an  
33  
34 earlier study where just under half (41.6%, 290/697) of responding subscribers changed their  
35  
36 practice.<sup>10</sup>  
37  
38

39  
40 The CC does not provide rigid guidelines. Instead it provides information that is relayed in the  
41  
42 classic human narrative form of story-telling. This is non-hierarchical and the lessons are  
43  
44 presented in context. Not only is this form of PEM thought-provoking, it stimulates dialogue  
45  
46 between colleagues. 62.4% (590/945) of respondents reported using the CC as a teaching aid,  
47  
48 suggesting they not only read it for personal interest but find the cases and topics highly  
49  
50  
51  
52  
53  
54  
55  
56  
57  
58  
59  
60

1  
2  
3 relevant to their work, or their work setting, team, or students, and view the material as an  
4  
5 appropriate educational resource.  
6

7  
8 Reading individual cases of patient deaths engenders self-reflection and self-assessment, and  
9  
10 encourages healthcare professionals to ask: can this happen to my patient?  
11

12  
13 An important finding was that a quarter of all respondents (26.0%, 109/419) attributed a  
14  
15 practice change solely to reading the CC. Of those that felt a practice change would have  
16  
17 occurred eventually, the majority acknowledged that the change would have been smaller and  
18  
19 taken longer.  
20  
21

22  
23 The survey questions did not explore the extent to which 'practice change' was conceived.  
24

25  
26 Instead, this study focused on more tangible outcomes such as projects and initiatives as  
27  
28 indicators of practice change. Subtle changes such as a change in communication, or simply  
29  
30 reflecting on a case during a patient-interaction was not asked about, but could occur on a  
31  
32 much more frequent basis and may influence practice in ways that are harder to measure.  
33  
34

35  
36 The multivariate analysis showed that residential aged care (RAC) staff were more likely to  
37  
38 make practice changes. This was an unexpected finding and may have reflected greater  
39  
40 familiarity that some RAC staff have with utilisation of the CC, through its sister publication, the  
41  
42 Residential Aged Care Communiqué (now in its tenth year of publication), and its potential to  
43  
44 facilitate change. The findings that medical practitioners and pharmacists under the age of 35  
45  
46 years and working with minimal patient contact were less likely to change their practice as a  
47  
48 result of reading the CC, may suggest that the educational relevance was not as applicable to  
49  
50 their working roles and environment. The cases were predominantly set in hospital wards, and  
51  
52  
53  
54  
55  
56  
57  
58  
59  
60

1  
2  
3 the key messages were largely centred around staff tasked with responding to an acutely  
4  
5  
6 unwell patient.  
7

8  
9 A limitation of this study is that subscribers were asked to participate and discuss practice  
10  
11 change after only four issues had been released. Clinical guidelines can take up to three years  
12  
13 to be fully implemented.<sup>16</sup> There are many challenges to the development of clinical guidelines.  
14  
15 Failure to address the key areas of funding, clinical involvement, conflicts of interest, intended  
16  
17 setting or audience, can all hamper the implementation of guidelines that inform practice  
18  
19 change to improve patient care.<sup>18</sup>  
20  
21

22  
23 Another limitation of this study is that the scope did not allow the investigators to examine in  
24  
25 detail the changes that were reported, or whether the practice changes sustained over time.  
26  
27

28 Therefore, quantifying the risk reduction and lives saved is not possible.  
29

30  
31 Furthermore, the response rate (30.0%) leaves potential for non-response bias where non-  
32  
33 respondents could have characteristics that differ from survey respondents. Analyses for non-  
34  
35 response bias (Supplementary Table 2) reveal that the proportions of survey participants were  
36  
37 greater for the older age group (>55 years) and for respondents who identified as quality and  
38  
39 risk managers. This is likely to contribute to an overestimate of effect of the impact of PEM. If  
40  
41 we assume all non-respondents did not change practice, the estimate of impact is still large at  
42  
43  
44 14.7% of all subscribers (496/3,373).  
45  
46  
47

48  
49 In addition, pairwise deletion can be a source of bias as there may be a non-random pattern of  
50  
51 missing data.<sup>19</sup> Also, control groups were not utilised.  
52  
53  
54  
55

## 56 Conclusion

57  
58  
59  
60

1  
2  
3 Investigations into patient deaths identify preventable errors and enhance knowledge of the  
4  
5 many risks to patients that exist in the healthcare setting. The design and content of the CC has  
6  
7 generated a positive impact on the healthcare community. It is presented in a format that  
8  
9 appears to be accessible and acceptable to readers and achieves its goals of promoting safer  
10  
11 clinical care through greater awareness of the medico-legal context of practice.  
12  
13  
14  
15  
16  
17  
18  
19

## 20 **Contributors**

21  
22 **JEI** contributed to conception, design and development of the study, assembly of the survey  
23  
24 and revising the manuscript critically for important intellectual content; and as senior author is  
25  
26 accountable for all aspects of the work in ensuring that questions related to the accuracy or  
27  
28 integrity of any part of the work are appropriately investigated and resolved. **NC** contributed to  
29  
30 development of the survey, was involved in drafting the manuscript and revising it critically for  
31  
32 important intellectual content. **TP** performed the statistical analysis was involved in drafting the  
33  
34 manuscript and revising it critically for important intellectual content. **BK** contributed to  
35  
36 development of the study, was involved in revising the manuscript critically for important  
37  
38 intellectual content. **AG** contributed to development, distribution, monitoring and collation of  
39  
40 the survey. All authors read and approved the final manuscript.  
41  
42  
43  
44  
45  
46  
47  
48  
49

## 50 **Funding**

51  
52 The Victorian Managed Insurance Authority (VMIA) funded this study.  
53  
54  
55  
56  
57  
58  
59  
60

## Competing interests

JEI and NC are directly involved in the production of the “Clinical Communiqué”. Otherwise the authors have no competing interests.

## Data sharing statement

No additional data available.

## References

1. Rafter N, Hickey A, Condell S, et al. Adverse events in healthcare: learning from mistakes. *QJM* 2015;108(4):273-277.
2. McKee M, Healy J. The role of the hospital in a changing environment. *Bull World Health Organ* [online] 2000;78(6):803-810.
3. Grol R, Wensing M. What drives change? Barriers to and incentives for achieving evidence-based practice. *Med J Aust* 2004;180(6 SUPPL.):S57-S60.
4. Travaglia J, Debono D, Thoms D, Hillman K, Middleton S, Hughes C, Braithwaite J (2011). *Change management strategies and practice development in nursing: a review of the literature*. Sydney: Centre for Healthcare Resilience and Implementation Science, Australian Institute of Health Innovation, University of New South Wales. ISBN: 978-0-7334-3071-8.
5. Cook D, Montori V, McMullin J, Finfer S, Rocker G. Improving patients' safety locally: changing clinician behaviour. *Lancet* 2004;363:1224-1230.
6. About the Clinical Communiqué. [Online] Melbourne: VIFM Communiqués; 2014 [updated 2016]; Available from: <http://www.vifmcommuniques.org/about-the-clinical-communication/>
7. Ibrahim J, Cunningham N, O'Brien A, Charles A, Young C. The impact of a clinical team assisting the Coroner's investigation of healthcare-related deaths: reflections on six-years of service. *Leg Med* 2010;12:28-34.
8. Australian Commission on Safety and Quality in Health Care, *National Safety and Quality Health Service Standards (September 2012)*. Sydney. ACSQHC, 2012.
9. Ibrahim J, Ehsani J. The impact of the Coronal Communiqué on changing patient safety: a subscriber survey. *Aust Health Rev* 2009;33:583-591.
10. Ibrahim J, Ehsani J, McInnes J. The effect of printed educational material from the coroner in Victoria, Australia, on changing aged care health professional practice: a subscriber survey. *J Am Geriatr Soc* 2010;58(3):585-591.

- 1
- 2
- 3
- 4 11. Pham D, Ibrahim J, Kitching F, Bohensky M. Aged-care professionals' and health care
- 5 professionals' self-reported impact of printed educational material on clinical practice. *J*
- 6 *Contin Educ Health Prof* 2016;36(1):38-45.
- 7
- 8 12. Dillman D. *Mail and telephone surveys: The Total Design Method*. New York: J Wiley;
- 9 1999.
- 10
- 11 13. Hosmer D, Lemeshow S. *Applied logistic regression*. New York: Wiley; 2000.
- 12 14. Nulty D. The adequacy of response rates to online and paper surveys: what can be
- 13 done? *Assessment & Evaluation in Higher Education* 2008;33(3):301-314.
- 14 15. Giguere A, Legare F, Grimshaw J, et al. Printed educational materials: effects on
- 15 professional practice and healthcare outcomes. *Cochrane Database Syst Rev*
- 16 2012;10:CD004398.
- 17 16. National Institute for Health and Clinical Excellence. (2007). *How to change practice:*
- 18 *Understand, identify and overcome barriers to change*. London: NICE. Retrieved from:
- 19 <http://www.nice.org.uk/usingguidance/implementationtools/howtoguide/barrierstochange.jsp>
- 20
- 21
- 22 17. Allery L, Owen P, Robling M. Why general practitioners and consultants change their
- 23 clinical practice: a critical incident study. *BMJ* 1997;314(7084):870-874.
- 24 18. National Health and Medical Research Council. *2014 Annual Report on Australian*
- 25 *Clinical Practice Guidelines*. NHMRC. Canberra: National Health and Medical Research
- 26 Council; 2014.
- 27 [http://www.nhmrc.gov.au/files/nhmrc/publications/attachments/nh165\\_2014\\_nhmrc](http://www.nhmrc.gov.au/files/nhmrc/publications/attachments/nh165_2014_nhmrc_clinical_guidelines_annual_report_140805.pdf)
- 28 [clinical\\_guidelines\\_annual\\_report\\_140805.pdf](http://www.nhmrc.gov.au/files/nhmrc/publications/attachments/nh165_2014_nhmrc_clinical_guidelines_annual_report_140805.pdf)
- 29
- 30
- 31 19. Newman D. Missing Data. *Organizational Research Methods* 2014;17(4):372-411.
- 32
- 33
- 34
- 35
- 36
- 37
- 38
- 39
- 40
- 41
- 42
- 43
- 44
- 45
- 46
- 47
- 48
- 49
- 50
- 51
- 52
- 53
- 54
- 55
- 56
- 57
- 58
- 59
- 60

## Boxes and Tables

### Box 1.

#### History of the Clinical Communiqué

The CC was launched in September 2014 as a revamped version of the Coronial Communiqué. Established in 2003, the Coronial Communiqué represented the first serial electronic publication of narrative case reports about clinical lessons learned from patient deaths investigated by the Victorian Coroner's Office.<sup>7</sup> Twenty-one editions were released before it went into a hiatus in 2009 due to resource constraints. In its current form, the CC is published quarterly and uses coronial cases from local, interstate, and international jurisdictions to explore the challenges that clinicians face every day in providing clinical care. Each issue identifies key themes that are vital to improving patient safety such as communication, supervision, decision-making, and recognising the deteriorating patient. Many of the themes are reflected in the National Safety and Quality Health Service Standards.<sup>8</sup> These are presented as case summaries and expert commentaries.

**Table 1.** Demographic and occupational characteristics and respondent reading behaviour (N=1008)

| Demographic and occupational characteristics        |                                       | n   | %    |
|-----------------------------------------------------|---------------------------------------|-----|------|
| <b>Age (years)<sup>a</sup></b>                      |                                       |     |      |
|                                                     | ≤34                                   | 101 | 11.6 |
|                                                     | 35-44                                 | 196 | 22.5 |
|                                                     | 45-54                                 | 308 | 35.3 |
|                                                     | ≥55                                   | 268 | 30.7 |
| <b>Gender<sup>a</sup></b>                           |                                       |     |      |
|                                                     | Female                                | 643 | 73.7 |
|                                                     | Male                                  | 230 | 26.3 |
| <b>Professional Role<sup>a</sup></b>                |                                       |     |      |
|                                                     | Allied Health Professional            | 25  | 2.9  |
|                                                     | Medical Practitioner                  | 240 | 27.5 |
|                                                     | Nurse                                 | 277 | 31.7 |
|                                                     | Paramedic                             | 24  | 2.7  |
|                                                     | Pharmacist                            | 35  | 4.0  |
|                                                     | Quality and Risk Manager              | 99  | 11.3 |
|                                                     | Other                                 | 173 | 19.8 |
| <b>Experience in profession (years)<sup>a</sup></b> |                                       |     |      |
|                                                     | ≤5                                    | 183 | 21.0 |
|                                                     | 6-10                                  | 130 | 14.9 |
|                                                     | 11-15                                 | 115 | 13.2 |
|                                                     | 16-20                                 | 86  | 9.9  |
|                                                     | ≥21                                   | 359 | 41.1 |
| <b>Workplace setting<sup>a</sup></b>                |                                       |     |      |
|                                                     | Government Department/Agency          | 41  | 4.7  |
|                                                     | Hospital – Acute                      | 451 | 51.7 |
|                                                     | Hospital – Subacute                   | 47  | 5.4  |
|                                                     | Primary Care                          | 72  | 8.2  |
|                                                     | Residential Aged Care Service         | 109 | 12.5 |
|                                                     | University or Other Academic          | 32  | 3.7  |
|                                                     | Other                                 | 121 | 13.9 |
| <b>State or country<sup>a</sup></b>                 |                                       |     |      |
|                                                     | Victoria                              | 549 | 62.9 |
|                                                     | Other State or Territory of Australia | 313 | 35.9 |
|                                                     | Other Country                         | 11  | 1.3  |

| <b>Frequency of patient interaction per week (days)<sup>a</sup></b> |               |     |      |
|---------------------------------------------------------------------|---------------|-----|------|
|                                                                     | Less than one | 230 | 26.3 |
|                                                                     | One           | 58  | 6.6  |
|                                                                     | Two or three  | 107 | 12.3 |
|                                                                     | Four or more  | 478 | 54.8 |

#### **Level of contact with Coroners Court<sup>a</sup>**

|  |                                                    |     |      |
|--|----------------------------------------------------|-----|------|
|  | Taken part in an inquest                           | 148 | 17.0 |
|  | Provided a statement                               | 207 | 23.7 |
|  | Contacted Court to discuss if death was reportable | 338 | 38.7 |
|  | Contacted Court for other reasons                  | 289 | 33.1 |
|  | No contact                                         | 299 | 34.2 |

#### **Respondent Reading Behaviour and Preferences**

**n %**

##### **Respondent reading behaviour**

|  |                                                   |     |      |
|--|---------------------------------------------------|-----|------|
|  | Read all 4 issues <sup>b</sup>                    | 466 | 47.1 |
|  | Read all or almost all of each issue <sup>c</sup> | 747 | 79.0 |

##### **Respondents regularly read the following sections<sup>d,e</sup>**

|  |                   |     |      |
|--|-------------------|-----|------|
|  | Case summaries    | 927 | 99.3 |
|  | Expert commentary | 916 | 98.0 |
|  | Editorial         | 821 | 88.1 |
|  | Resources list    | 525 | 56.6 |

##### **Use of the Clinical Communiqué<sup>c,e</sup>**

|  |                                      |     |      |
|--|--------------------------------------|-----|------|
|  | I read it as soon as it arrives      | 802 | 84.9 |
|  | I encourage my colleagues to read it | 681 | 72.1 |
|  | I refer to it in my job              | 407 | 43.1 |
|  | I use it as a teaching aid           | 590 | 62.4 |

##### **Number of people with access to the Clinical Communiqué<sup>c,f</sup>**

|  |                           |     |      |
|--|---------------------------|-----|------|
|  | Only myself               | 441 | 46.7 |
|  | One other person          | 53  | 5.6  |
|  | 3 to 5 other people       | 124 | 13.1 |
|  | 6 to 10 other people      | 85  | 9.0  |
|  | 11 to 20 other people     | 73  | 7.7  |
|  | 21 to 30 other people     | 62  | 6.6  |
|  | More than 31 other people | 107 | 11.3 |

<sup>a</sup>135 respondents failed to answer this question and were not included in the analysis (N=873)

<sup>b</sup>19 respondents failed to answer this question and were not included in the analysis (N=989)

<sup>c</sup>63 respondents failed to answer this question and were not included in the analysis

(N=945)

<sup>d</sup>The number of respondents varies for this question (N=934, 935, 932, 928) respectively

<sup>e</sup>Five-point Likert scale, 5=strongly agree to 1=strongly disagree. Positive responses are counted as the sum of responses that stated 'strongly agree' and 'agree'

<sup>f</sup>The reach of the CC was calculated from these results. The lower (28,575) and upper ranges (30,958) were determined by multiplying the number of respondents with the extremes of their response. Respondents who answered 'more than 31 other people' to this question were given an option to provide the actual number and where available, this response was used in the calculation

NB. Because of rounding not all percentages cumulatively sum to 100

For peer review only

**Table 2.** Respondent Evaluation Criteria (N=1008)

| Respondent Evaluation Criteria                                                                                                                                                         | n   | %    | Median (25 <sup>th</sup> - 75 <sup>th</sup> percentile) |
|----------------------------------------------------------------------------------------------------------------------------------------------------------------------------------------|-----|------|---------------------------------------------------------|
| <b>Information given in the Clinical Communiqué is:<sup>a,c</sup></b>                                                                                                                  |     |      |                                                         |
| Useful                                                                                                                                                                                 | 928 | 99.1 | 5 (4-5)                                                 |
| Reliable                                                                                                                                                                               | 907 | 96.9 | 5 (4-5)                                                 |
| Timely                                                                                                                                                                                 | 728 | 77.8 | 4 (4-5)                                                 |
| Easy to understand                                                                                                                                                                     | 912 | 97.4 | 5 (4-5)                                                 |
| Written in plain language                                                                                                                                                              | 917 | 98.0 | 5 (4-5)                                                 |
| <b>The following sections of the Clinical Communiqué are useful for improving patient care:<sup>a,c</sup></b>                                                                          |     |      |                                                         |
| Case summaries                                                                                                                                                                         | 922 | 98.5 | 5 (4-5)                                                 |
| Expert commentary                                                                                                                                                                      | 914 | 97.6 | 5 (4-5)                                                 |
| Editorial                                                                                                                                                                              | 799 | 85.4 | 4 (4-5)                                                 |
| Resources list                                                                                                                                                                         | 628 | 67.1 | 4 (3-4)                                                 |
| <b>Reading the Clinical Communiqué<sup>b,c</sup></b>                                                                                                                                   |     |      |                                                         |
| Raised awareness about improving patient safety and clinical care                                                                                                                      | 912 | 96.5 | 5 (4-5)                                                 |
| Provided ideas for improving safety and clinical care                                                                                                                                  | 889 | 94.1 | 4 (4-5)                                                 |
| Prompted me to discuss cases with colleagues                                                                                                                                           | 752 | 79.6 | 4 (4-5)                                                 |
| Prompted me to review my practice                                                                                                                                                      | 715 | 75.7 | 4 (4-4)                                                 |
| <b>The length of the Clinical Communiqué is just right<sup>a</sup></b>                                                                                                                 | 766 | 81.8 | –                                                       |
| <b>I would recommend the Clinical Communiqué to my colleagues<sup>a,d</sup></b>                                                                                                        | 927 | 99.0 | 5 (5-5)                                                 |
| <sup>a</sup> 72 respondents failed to answer this question and were excluded from analysis (N=936)                                                                                     |     |      |                                                         |
| <sup>b</sup> 63 respondents failed to answer this question and were excluded from analysis (N=945)                                                                                     |     |      |                                                         |
| <sup>c</sup> Five-point Likert scale, 5=strongly agree to 1=strongly disagree. Positive responses are counted as the sum of responses that stated 'strongly agree' and 'agree'         |     |      |                                                         |
| <sup>d</sup> Five-point Likert scale, 5 = definitely yes to 1 = definitely not. Positive responses are counted as the sum of responses that stated 'definitely yes' and 'probably yes' |     |      |                                                         |

**Table 3.** Details of self-reported change to practice (N=496)

| <b>Characteristics of practice change</b>                                              | <b>n</b> | <b>%</b> |
|----------------------------------------------------------------------------------------|----------|----------|
| <b>Workplace<sup>a</sup></b>                                                           |          |          |
| Emergency department                                                                   | 89       | 21.2     |
| Intensive care unit                                                                    | 42       | 10.0     |
| Operating theatre                                                                      | 51       | 12.2     |
| Inpatient ward                                                                         | 146      | 34.8     |
| Outpatient unit primary care                                                           | 47       | 11.2     |
| Residential aged care facility                                                         | 119      | 28.4     |
| Other                                                                                  | 92       | 22.0     |
| <b>Who was involved in the practice change?<sup>a</sup></b>                            |          |          |
| One discipline group (e.g. doctors only)                                               | 157      | 37.5     |
| Two discipline groups (e.g. doctors and nurses)                                        | 188      | 44.9     |
| Three discipline groups (e.g. doctors, nurses and pharmacists)                         | 48       | 11.5     |
| Four or more discipline groups                                                         | 38       | 9.1      |
| <b>Practice change was related to<sup>a</sup></b>                                      |          |          |
| Education and training                                                                 | 286      | 68.3     |
| Policy, procedures and protocols                                                       | 182      | 43.4     |
| Clinical practice                                                                      | 283      | 67.5     |
| Evaluation of care                                                                     | 142      | 33.9     |
| Documentation of practice                                                              | 205      | 48.9     |
| Improving staff morale/attitude                                                        | 122      | 29.1     |
| Environment/equipment                                                                  | 65       | 15.5     |
| <b>Edition of the Clinical Communiqué which influenced practice change<sup>a</sup></b> |          |          |
| 'Communiqué cases and the National Health Service Standards'                           | 124      | 29.6     |
| 'Recognising early warning signs of the deteriorating patient'                         | 341      | 81.4     |
| 'Communication and decision making at the bedside'                                     | 253      | 60.4     |
| 'Responding as a team to medical emergency'                                            | 191      | 45.6     |
| <b>The practice change had an impact on<sup>a</sup></b>                                |          |          |
| Patient care                                                                           | 339      | 80.9     |
| Staff                                                                                  | 380      | 90.7     |
| Environment                                                                            | 215      | 51.3     |
| Organisation                                                                           | 268      | 64.0     |
| <b>The action taken in the practice change was to<sup>a</sup></b>                      |          |          |
| Introduce a new initiative                                                             | 71       | 16.9     |
| Alter or modify an existing initiative                                                 | 382      | 91.2     |
| Discontinue an existing initiative                                                     | 24       | 5.7      |

**Number of initiatives where the Clinical Communiqué was used to change practice<sup>a</sup>**

|              |     |      |
|--------------|-----|------|
| One          | 151 | 36.0 |
| Two          | 175 | 41.8 |
| Three        | 63  | 15.0 |
| Four         | 12  | 2.9  |
| Five or more | 19  | 4.5  |

**Degree to which the Clinical Communiqué influenced practice change<sup>a,b</sup>**

|                                        |     |      |
|----------------------------------------|-----|------|
| Selecting area of improvement          | 306 | 73.0 |
| Defining the scope of the project      | 173 | 41.3 |
| Engaging senior management             | 189 | 45.1 |
| Engaging point of care staff           | 276 | 65.9 |
| Identifying required resources         | 203 | 48.5 |
| Setting project timelines              | 76  | 18.1 |
| Gathering background research/analysis | 227 | 54.2 |

**The Clinical Communiqué influenced practice change<sup>a,c</sup>**

|                                                        |     |      |
|--------------------------------------------------------|-----|------|
| By raising awareness of an issue                       | 409 | 97.6 |
| By engaging staff                                      | 354 | 84.5 |
| Because of the authority of the publication            | 310 | 74.0 |
| By suggesting improvement strategies                   | 359 | 85.7 |
| By prompting staff to evaluate their existing practice | 369 | 88.1 |

**If the Clinical Communiqué had not been available, the change would have<sup>a,c</sup>**

|                             |     |      |
|-----------------------------|-----|------|
| Happened anyway             | 129 | 30.8 |
| Taken longer                | 347 | 82.8 |
| Happened on a smaller scale | 236 | 56.3 |
| Not occurred                | 109 | 26.0 |

<sup>a</sup>77 respondents failed to answer this question and were excluded from analysis (N=419)

<sup>b</sup>Five-point Likert scale, 5=strongly agree to 1=strongly disagree. Positive responses are counted as the sum of responses that stated 'strongly agree' and 'agree'

<sup>c</sup>Five-point Likert scale, 5=extremely influential to 1=not at all influential. Positive responses are counted as the sum of responses that stated 'extremely influential' and 'very influential'

**Box 2.****Reach of the Clinical Communiqué**

As the CC is delivered via email, it is difficult to determine exactly how many people are being exposed to the contents of the CC. Therefore by asking respondents how many people have access to the CC at their workplace, it was calculated that for this sample of 1,008 respondents, the CC reached between 28,575 and 30,958 people. Therefore, each person on average, shared the CC with at least 9 other people.

peer review only

| Characteristic                                                   | Changed practice |      | Did not change practice |      | Multivariate odds ratio (95% confidence interval) | Chi-Square | p-value (bivariate) |
|------------------------------------------------------------------|------------------|------|-------------------------|------|---------------------------------------------------|------------|---------------------|
|                                                                  | n                | %    | n                       | %    |                                                   |            |                     |
| <b>Age (years)<sup>a</sup></b>                                   |                  |      |                         |      |                                                   |            |                     |
| 45-54                                                            | 160              | 52.8 | 143                     | 47.2 | 1.00                                              |            |                     |
| <35                                                              | 29               | 29.0 | 71                      | 71.0 | 0.45 (0.27-0.77)*                                 |            |                     |
| 35-44                                                            | 110              | 57.3 | 82                      | 42.7 | 1.48 (0.99-2.22)                                  |            |                     |
| >54                                                              | 118              | 45.0 | 144                     | 55.0 | 0.72 (0.50-1.04)                                  | 24.36      | <0.01               |
| <b>Gender<sup>a</sup></b>                                        |                  |      |                         |      |                                                   |            |                     |
| Female                                                           | 316              | 44.3 | 313                     | 55.7 | 1.00                                              |            |                     |
| Male                                                             | 101              | 44.3 | 127                     | 49.8 | 0.80 (0.55-1.17)                                  | 2.36       | 0.12                |
| <b>Professional role<sup>a</sup></b>                             |                  |      |                         |      |                                                   |            |                     |
| Nurse                                                            | 155              | 57.4 | 115                     | 42.6 | 1.00                                              |            |                     |
| Allied health                                                    | 24               | 50.0 | 24                      | 50.0 | 1.28 (0.63-2.62)                                  |            |                     |
| Medical practitioner                                             | 95               | 40.4 | 140                     | 59.6 | 0.49 (0.31-0.77)*                                 |            |                     |
| Pharmacist                                                       | 5                | 14.3 | 30                      | 85.7 | 0.15 (0.05-0.40)*                                 |            |                     |
| Quality and risk manager                                         | 55               | 56.1 | 43                      | 43.9 | 1.07 (0.61-1.87)                                  |            |                     |
| Other                                                            | 83               | 48.5 | 88                      | 51.5 | 1.03 (0.65-1.64)                                  | 33.42      | <0.01               |
| <b>Years of experience<sup>a</sup></b>                           |                  |      |                         |      |                                                   |            |                     |
| <6                                                               | 81               | 45.0 | 99                      | 55.0 |                                                   |            |                     |
| 6-10                                                             | 54               | 41.5 | 76                      | 58.5 |                                                   |            |                     |
| 11-15                                                            | 50               | 44.6 | 62                      | 55.4 |                                                   |            |                     |
| 16-20                                                            | 51               | 68.0 | 24                      | 32.0 |                                                   |            |                     |
| >20                                                              | 181              | 51.7 | 169                     | 48.3 | †                                                 | 10.01      | 0.04                |
| <b>Workplace location<sup>a</sup></b>                            |                  |      |                         |      |                                                   |            |                     |
| Hospital                                                         | 238              | 48.4 | 254                     | 51.6 | 1.00                                              |            |                     |
| Government department                                            | 16               | 39.0 | 25                      | 61.0 | 0.81 (0.38-1.72)                                  |            |                     |
| Primary care                                                     | 36               | 52.2 | 33                      | 47.8 | 1.18 (0.68-2.02)                                  |            |                     |
| Residential aged care service                                    | 75               | 70.1 | 32                      | 29.9 | 1.95 (1.18-3.24)*                                 |            |                     |
| Other                                                            | 52               | 35.1 | 96                      | 64.9 | 0.48 (0.31-0.75)*                                 | 32.39      | <0.01               |
| <b>Frequency of patient contact (times per week)<sup>a</sup></b> |                  |      |                         |      |                                                   |            |                     |
| Four or more                                                     | 240              | 51.2 | 229                     | 48.8 | 1.00                                              |            |                     |
| Less than one                                                    | 92               | 40.7 | 134                     | 59.3 | 0.51 (0.33-0.81)*                                 |            |                     |
| One                                                              | 32               | 56.1 | 25                      | 43.9 | 1.03 (0.54-1.95)                                  |            |                     |
| Two or three                                                     | 53               | 50.5 | 52                      | 49.5 | 0.83 (0.52-1.33)                                  | 8.32       | 0.04                |

| <b>Level of contact with the Coroners Court<sup>a</sup></b> |     |      |     |      |                   |       |       |  |
|-------------------------------------------------------------|-----|------|-----|------|-------------------|-------|-------|--|
| Has not taken part in an inquest                            | 331 | 46.6 | 380 | 53.4 | 1.00              |       |       |  |
| Taken part in an inquest                                    | 86  | 58.9 | 60  | 41.1 | 1.92 (1.24-2.98)* | 7.40  | <0.01 |  |
| Has not provided a statement                                | 315 | 48.3 | 337 | 51.7 |                   |       |       |  |
| Provided a statement                                        | 102 | 49.8 | 103 | 50.2 | ‡                 | 0.13  | 0.72  |  |
| Has not contacted court to discuss if death was reportable  | 243 | 46.5 | 280 | 53.5 | 1.00              |       |       |  |
| Contacted court to discuss if death was reportable          | 174 | 52.1 | 160 | 47.9 | 1.15 (0.77-1.70)  | 2.59  | 0.11  |  |
| Has not contacted court for other reasons                   | 258 | 45.3 | 312 | 54.7 | 1.00              |       |       |  |
| Contacted court for other reasons                           | 159 | 55.4 | 128 | 44.6 | 1.33 (0.93-1.91)  | 7.85  | <0.01 |  |
| Has had some form of contact with the Coroners Court        | 292 | 51.5 | 275 | 48.5 | 1.00              |       |       |  |
| No contact with the Coroners Court                          | 125 | 43.1 | 165 | 56.9 | 0.97 (0.65-1.47)  | 5.41  | 0.02  |  |
| <b>Number of editions read<sup>b</sup></b>                  |     |      |     |      |                   |       |       |  |
| All (4)                                                     | 270 | 59.0 | 188 | 41.0 | 1.00              |       |       |  |
| Some (1 or 2)                                               | 63  | 41.4 | 89  | 58.6 | 0.52 (0.34-0.81)* |       |       |  |
| At least half (2 or 3)                                      | 163 | 50.0 | 163 | 50.0 | 0.70 (0.53-1.02)  | 15.84 | <0.01 |  |
| <b>Amount of an issue read (pages)<sup>c</sup></b>          |     |      |     |      |                   |       |       |  |
| All or almost all (4-6)                                     | 418 | 56.5 | 322 | 43.5 | 1.00              |       |       |  |
| Less than half (<3)                                         | 18  | 39.1 | 28  | 60.9 | 0.71 (0.33-1.52)  |       |       |  |
| Half (3)                                                    | 60  | 40.0 | 90  | 60.0 | 0.71 (0.47-1.07)  | 17.34 | <0.01 |  |

<sup>a</sup>135 respondents failed to answer this question and were not included in the analysis (N=873)

<sup>b</sup>19 respondents failed to answer this question and were not included in the analysis. 16 respondents had not read any editions and were unable to answer the question about practice change (N=973)

<sup>c</sup>63 respondents failed to answer this question and were not included in the analysis (N=945)  
p<0.05\*

‡Variable dropped as p>0.25

†Variable dropped due to collinearity with age (r=0.41)

Supplementary Table 2: Descriptive comparison of CC subscribers and survey respondents

|                            | A          | B          | C           | D           | E          | F          | G          |
|----------------------------|------------|------------|-------------|-------------|------------|------------|------------|
|                            | Subscriber | Subscriber | Survey      | Survey      | Non-       | Non-       | Difference |
|                            | (N)        | (%)        | Respondents | Respondents | responders | responders | Survey vs. |
|                            |            |            | (n)         | (%)         | (n)        | (%)        | Non-       |
|                            |            |            |             |             |            |            | response   |
|                            |            |            |             |             |            |            | (%)        |
|                            | 3373       | 100%       | 1008        | 100%        | 2365       | 100%       |            |
| <b>Gender</b>              |            |            |             |             |            |            |            |
| Female                     | 2270       | 67.3       | 643         | 63.8        | 1627       | 68.8       | -5         |
| Male                       | 860        | 25.5       | 230         | 22.8        | 630        | 26.6       | -3.8       |
| (blank)                    | 243        | 7.2        | 135         | 13.4        | 108        | 4.6        | 8.8        |
| <b>Age (years)</b>         |            |            |             |             |            |            |            |
| ≤34                        | 547        | 16.2       | 101         | 10.0        | 446        | 18.9       | -8.9       |
| 35 to 44                   | 758        | 22.5       | 196         | 19.4        | 562        | 23.8       | -4.4       |
| 45 to 54                   | 930        | 27.6       | 308         | 30.6        | 622        | 26.3       | 4.3        |
| 55 and over                | 737        | 21.8       | 268         | 26.6        | 469        | 19.8       | 6.8        |
| (blank)                    | 401        | 11.9       | 135         | 13.4        | 266        | 11.2       | 2.2        |
| <b>Occupation</b>          |            |            |             |             |            |            |            |
| Allied Health Professional | 109        | 3.2        | 25          | 2.5         | 84         | 3.6        | -1.1       |
| Medical Practitioner       | 1074       | 31.8       | 240         | 23.8        | 834        | 35.3       | -11.5      |
| Nurse                      | 1183       | 35.1       | 277         | 27.5        | 906        | 38.3       | -10.8      |
| Paramedic                  | 108        | 3.2        | 24          | 2.4         | 84         | 3.6        | -1.2       |
| Pharmacist                 | 137        | 4.1        | 35          | 3.5         | 102        | 4.3        | -0.8       |
| Quality and Risk Manager   | 194        | 5.8        | 99          | 9.8         | 95         | 4.0        | 5.8        |
| Other                      | 324        | 9.6        | 173         | 17.2        | 151        | 6.4        | 10.8       |
| (blank)                    | 244        | 7.2        | 135         | 13.4        | 109        | 4.6        | 8.8        |

**Commentary****Gender:**

The proportion of the survey participants who did not respond to the question about gender (13.4%) was much greater than the non-respondents (4.6%). The proportion of female subscribers who responded to the survey (63.8%) was lower than the non-respondents (68.8%).

*The impact of this non-response bias on the overall findings is likely to be minimal as there is not any reason to consider that the gender of a health professional is an important factor in patient safety. While there are gender differences in workforce distribution of the health professional this is addressed specifically below.*

**Age:**

The proportion of the younger subscribers, those aged 34 years or less, who did not respond to the survey (18.9%) was much greater than those who did (10.0%). Conversely, the proportions of older subscribers, those aged 55 years and older, who completed the survey (26.6%) was substantially more than non-respondents (19.8%).

*The impact of this non-response bias is likely to be an overestimate of the impact of the PEM. The impact of PEM may have a lesser effect on a younger population who are less experienced and prefer to source information from their immediate supervisors. Another possibility is that younger health professionals may not have responded because they are not in a position within their organisation to influence practice. Another consideration is whether fewer young professionals responded due to the greater volume of electronic information they receive each day through their personal mobile devices.*

**Occupation:**

The proportion of non-responders who listed their occupation as either medical practitioners (35.3%) or nurses (38.3%) was much greater than those who participated in the survey 23.8% and 27.5% respectively. Conversely, the proportion identifying as 'quality and risk managers' who did complete the survey (9.8%) was substantially more than non-respondents (4.0%).

*The impact of this non-response bias on practice change could be bidirectional. The impact of PEM may be overestimated because the primary role of quality and risk managers is to change practice to improve patient safety. Potentially, they may have attributed the motivation for any change to the PEM rather than other local factors that were not immediately apparent. Conversely, the impact of PEM may have been underestimated with the lower response rates from medical practitioners and nurses who are often the primary decision makers in patient care and subsequently vital for any change in clinical practice.*

STROBE Statement—Checklist of items that should be included in reports of *cross-sectional studies*

|                              | Item No | Recommendation                                                                                                                                                                                                                                                                                                                                                                       |                            |
|------------------------------|---------|--------------------------------------------------------------------------------------------------------------------------------------------------------------------------------------------------------------------------------------------------------------------------------------------------------------------------------------------------------------------------------------|----------------------------|
| <b>Title and abstract</b>    | 1       | (a) Indicate the study's design with a commonly used term in the title or the abstract                                                                                                                                                                                                                                                                                               | Comment [TP1]: Completed.  |
|                              |         | (b) Provide in the abstract an informative and balanced summary of what was done and what was found                                                                                                                                                                                                                                                                                  | Comment [TP2]: Completed.  |
| <b>Introduction</b>          |         |                                                                                                                                                                                                                                                                                                                                                                                      |                            |
| Background/rationale         | 2       | Explain the scientific background and rationale for the investigation being reported                                                                                                                                                                                                                                                                                                 | Comment [TP3]: Completed.  |
| Objectives                   | 3       | State specific objectives, including any prespecified hypotheses                                                                                                                                                                                                                                                                                                                     | Comment [TP4]: Completed.  |
| <b>Methods</b>               |         |                                                                                                                                                                                                                                                                                                                                                                                      |                            |
| Study design                 | 4       | Present key elements of study design early in the paper                                                                                                                                                                                                                                                                                                                              | Comment [TP5]: Completed.  |
| Setting                      | 5       | Describe the setting, locations, and relevant dates, including periods of recruitment, exposure, follow-up, and data collection                                                                                                                                                                                                                                                      | Comment [TP6]: Completed.  |
| Participants                 | 6       | (a) Give the eligibility criteria, and the sources and methods of selection of participants                                                                                                                                                                                                                                                                                          | Comment [TP7]: Completed.  |
| Variables                    | 7       | Clearly define all outcomes, exposures, predictors, potential confounders, and effect modifiers. Give diagnostic criteria, if applicable                                                                                                                                                                                                                                             | Comment [TP8]: Completed.  |
| Data sources/<br>measurement | 8*      | For each variable of interest, give sources of data and details of methods of assessment (measurement). Describe comparability of assessment methods if there is more than one group                                                                                                                                                                                                 | Comment [TP9]: Completed.  |
| Bias                         | 9       | Describe any efforts to address potential sources of bias                                                                                                                                                                                                                                                                                                                            | Comment [TP10]: Completed. |
| Study size                   | 10      | Explain how the study size was arrived at                                                                                                                                                                                                                                                                                                                                            | Comment [TP11]: Completed. |
| Quantitative variables       | 11      | Explain how quantitative variables were handled in the analyses. If applicable, describe which groupings were chosen and why                                                                                                                                                                                                                                                         | Comment [TP12]: Completed. |
| Statistical methods          | 12      | (a) Describe all statistical methods, including those used to control for confounding<br>(b) Describe any methods used to examine subgroups and interactions<br>(c) Explain how missing data were addressed<br>(d) If applicable, describe analytical methods taking account of sampling strategy<br>(e) Describe any sensitivity analyses                                           | Comment [TP13]: Completed. |
| <b>Results</b>               |         |                                                                                                                                                                                                                                                                                                                                                                                      |                            |
| Participants                 | 13*     | (a) Report numbers of individuals at each stage of study—eg numbers potentially eligible, examined for eligibility, confirmed eligible, included in the study, completing follow-up, and analysed<br>(b) Give reasons for non-participation at each stage<br>(c) Consider use of a flow diagram                                                                                      | Comment [TP14]: Completed. |
| Descriptive data             | 14*     | (a) Give characteristics of study participants (eg demographic, clinical, social) and information on exposures and potential confounders<br>(b) Indicate number of participants with missing data for each variable of interest                                                                                                                                                      | Comment [TP15]: Completed. |
| Outcome data                 | 15*     | Report numbers of outcome events or summary measures                                                                                                                                                                                                                                                                                                                                 | Comment [TP16]: Completed  |
| Main results                 | 16      | (a) Give unadjusted estimates and, if applicable, confounder-adjusted estimates and their precision (eg, 95% confidence interval). Make clear which confounders were adjusted for and why they were included<br>(b) Report category boundaries when continuous variables were categorized<br>(c) If relevant, consider translating estimates of relative risk into absolute risk for | Comment [TP17]: Completed  |

1  
2  
3  
4  
5  
6  
7  
8  
9  
10  
11  
12  
13  
14  
15  
16  
17  
18  
19  
20  
21  
22  
23  
24  
25  
26  
27  
28  
29  
30  
31  
32  
33  
34  
35  
36  
37  
38  
39  
40  
41  
42  
43  
44  
45  
46  
47  
48  
49  
50  
51  
52  
53  
54  
55  
56  
57  
58  
59  
60

|                          |    |                                                                                                                                                                            |
|--------------------------|----|----------------------------------------------------------------------------------------------------------------------------------------------------------------------------|
|                          |    | a meaningful time period                                                                                                                                                   |
| Other analyses           | 17 | Report other analyses done—eg analyses of subgroups and interactions, and sensitivity analyses                                                                             |
| <b>Discussion</b>        |    |                                                                                                                                                                            |
| Key results              | 18 | Summarise key results with reference to study objectives                                                                                                                   |
| Limitations              | 19 | Discuss limitations of the study, taking into account sources of potential bias or imprecision. Discuss both direction and magnitude of any potential bias                 |
| Interpretation           | 20 | Give a cautious overall interpretation of results considering objectives, limitations, multiplicity of analyses, results from similar studies, and other relevant evidence |
| Generalisability         | 21 | Discuss the generalisability (external validity) of the study results                                                                                                      |
| <b>Other information</b> |    |                                                                                                                                                                            |
| Funding                  | 22 | Give the source of funding and the role of the funders for the present study and, if applicable, for the original study on which the present article is based              |

Comment [TP18]: Completed.

Comment [TP19]: Completed.

Comment [TP20]: Completed.

Comment [TP21]: Completed.

Comment [TP22]: Completed.

Comment [TP23]: Completed.

\*Give information separately for exposed and unexposed groups.

**Note:** An Explanation and Elaboration article discusses each checklist item and gives methodological background and published examples of transparent reporting. The STROBE checklist is best used in conjunction with this article (freely available on the Web sites of PLoS Medicine at <http://www.plosmedicine.org/>, Annals of Internal Medicine at <http://www.annals.org/>, and Epidemiology at <http://www.epidem.com/>). Information on the STROBE Initiative is available at [www.strobe-statement.org](http://www.strobe-statement.org).

review only
